# Supplementary material for: Coupled coordination relationship and enhancement path between digital economy and essential public health services in China
Source: Front Public Health. 2025 May 7;13:1517353. doi: 10.3389/fpubh.2025.1517353 (PMC12092431; doi:10.3389/fpubh.2025.1517353)
Supplement: Supplementary file 1 [file Table_1.xlsx]

## Sheet: Sheet1
行政区划代码	年份	地区	长江经济带	经度	纬度	数字经济水平_熵权法	数字经济水平_主成分	当年排名_熵权法	当年排名_主成分	数字普惠金融指数	互联网宽带接入用户_万户	信息传输、软件和信息技术服务业城镇单位就业人员_万人	城镇单位就业人员_万人	年末常住人口_万人	电信业务总量_亿元	移动电话年末用户_万户	每百人互联网用户数	计算机服务和软件从业人员占比	人均电信业务总量	每百人移动电话用户数
110000	2011	北京	0	116.407526	39.904030	0.9981	0.668875	1	1	79.41	510.8	49.1	685.9	2024	436.29	2576	25.2372	0.0716	0.2156	127.273
120000	2011	天津	0	117.200983	39.084158	0.344214	0.535619	6	8	60.58	186.7	2.1	268.2	1341	153.22	1235.6	13.9224	0.0078	0.1143	92.1402
130000	2011	河北	0	114.468664	38.037057	0.157212	0.510775	20	17	32.42	824.5	5.9	555.4	7232	491.34	5094.5	11.4007	0.0106	0.0679	70.4439
140000	2011	山西	0	112.562398	37.873531	0.180049	0.511872	14	16	33.41	416.1	4.9	409.7	3562	279.33	2446.9	11.6816	0.012	0.0784	68.6946
150000	2011	内蒙古	0	111.765617	40.817498	0.254556	0.535872	9	7	28.89	231	4.2	262.4	2470	231.51	2316.2	9.3522	0.016	0.0937	93.7733
210000	2011	辽宁	0	123.429440	41.835441	0.308998	0.538679	8	6	43.29	655.1	8.5	579.6	4379	434.42	3836.5	14.96	0.0147	0.0992	87.6113
220000	2011	吉林	0	125.325990	43.896536	0.214371	0.525643	12	11	24.51	307.4	5.8	277.9	2725	220.25	2004.1	11.2807	0.0209	0.0808	73.545
230000	2011	黑龙江	0	126.661669	45.742347	0.157065	0.505889	21	20	33.58	385.4	6.1	466.2	3782	277.65	2376.6	10.1904	0.0131	0.0734	62.8398
310000	2011	上海	1	121.473701	31.230416	0.609803	0.578065	2	2	80.19	493.5	8.2	497.3	2356	415.31	2620.6	20.9465	0.0165	0.1763	111.231
320000	2011	江苏	1	118.763232	32.061707	0.337862	0.534118	7	9	62.08	1171	9.9	811.3	8023	832.45	6684.8	14.5955	0.0122	0.1038	83.3205
330000	2011	浙江	1	120.152791	30.267446	0.489298	0.560853	3	3	77.39	1019.7	12.6	995.7	5570	750.4	5756	18.307	0.0127	0.1347	103.339
340000	2011	安徽	1	117.284922	31.861184	0.0824388	0.49084	26	27	33.07	432.6	4.4	411.6	5972	332.34	3259.4	7.2438	0.0107	0.0556	54.578
350000	2011	福建	0	119.295144	26.100779	0.376447	0.541982	5	5	61.76	605.2	5.4	596.3	3784	451.52	3553.2	15.9937	0.0091	0.1193	93.9006
360000	2011	江西	1	115.909228	28.675696	0.0608693	0.485892	28	31	29.74	313	3.2	344.4	4474	251.04	2322.1	6.996	0.0093	0.0561	51.9021
370000	2011	山东	0	117.020359	36.668530	0.180619	0.512221	13	15	38.55	1154.1	8.4	1050.4	9665	727.65	7118.1	11.941	0.008	0.0753	73.6482
410000	2011	河南	0	113.753602	34.765515	0.0586821	0.486017	30	30	28.4	784.5	5.9	839.1	9461	540.87	5062	8.2919	0.007	0.0572	53.5039
420000	2011	湖北	1	114.341861	30.546498	0.15833	0.507171	19	19	39.82	580.1	5.6	586.1	5760	388.89	3953.7	10.0712	0.0096	0.0675	68.6406
430000	2011	湖南	1	112.983810	28.112444	0.1042	0.495488	24	23	32.68	483.1	6.9	551.4	6581	400.47	3749.1	7.3408	0.0125	0.0609	56.9685
440000	2011	广东	0	113.266530	23.132191	0.485905	0.557492	4	4	69.48	1643.9	19.7	1238.2	10756	1617.16	10792.8	15.2836	0.0159	0.1503	100.342
450000	2011	广西	0	108.327546	22.815478	0.116141	0.495431	23	24	33.89	414.8	4.2	341.6	4655	304.67	2532.7	8.9108	0.0123	0.0655	54.4082
460000	2011	海南	0	110.349228	20.017377	0.237663	0.516443	11	13	45.56	80.4	1	85.1	890	86.65	671.6	9.0337	0.0118	0.0974	75.4607
500000	2011	重庆	1	106.551556	29.563009	0.171053	0.504681	16	21	41.89	319.9	3.9	337.2	2944	218.01	1801.2	10.8662	0.0116	0.0741	61.1821
510000	2011	四川	1	104.075931	30.651651	0.135509	0.498185	22	22	40.16	668.4	6.5	614	8064	550.33	4817.9	8.2887	0.0106	0.0682	59.7458
520000	2011	贵州	1	106.707410	26.598194	0.0521935	0.490416	31	28	18.47	204.8	2.7	241	3530	204.35	2044.3	5.8017	0.0112	0.0579	57.9122
530000	2011	云南	1	102.710002	25.045806	0.0829485	0.491511	25	26	24.91	298	4.1	350.1	4620	307.75	2589.5	6.4502	0.0117	0.0666	56.0498
540000	2011	西藏	0	91.117212	29.646922	0.0663566	0.49022	27	29	16.22	12.8	0.2	23.3	309	23.86	196.4	4.1424	0.0086	0.0772	63.5599
610000	2011	陕西	0	108.954239	34.265472	0.254286	0.527818	10	10	40.96	369.8	7.7	393.7	3765	319.66	2907.2	9.822	0.0196	0.0849	77.2165
620000	2011	甘肃	0	103.826308	36.059421	0.0588535	0.491858	29	25	18.84	133.6	1.8	199.3	2552	161.14	1614.7	5.2351	0.009	0.0631	63.2719
630000	2011	青海	0	101.780199	36.620901	0.165666	0.518942	17	12	18.33	41.6	0.9	60.6	568	45.89	463.5	7.3239	0.0149	0.0808	81.6021
640000	2011	宁夏	0	106.258754	38.471317	0.177659	0.514474	15	14	31.31	52.2	0.6	60.9	648	54.01	520.5	8.0556	0.0099	0.0833	80.3241
650000	2011	新疆	0	87.627704	43.793026	0.162844	0.509103	18	18	20.34	206.1	2.5	279.4	2225	217.36	1670.9	9.2629	0.0089	0.0977	75.0966
110000	2012	北京	0	116.407526	39.904030	0.99987	0.701117	1	1	150.65	473.7	52.6	717.4	2078	488.9	3168	22.796	0.0733	0.2353	152.454
120000	2012	天津	0	117.200983	39.084158	0.303508	0.554161	7	9	122.96	204.8	3.3	289.1	1378	159.35	1325.2	14.8621	0.0114	0.1156	96.1684
130000	2012	河北	0	114.468664	38.037057	0.153318	0.526572	21	19	89.32	963.9	6.5	619.9	7262	538.7	5513.1	13.2732	0.0105	0.0742	75.9171
140000	2012	山西	0	112.562398	37.873531	0.195207	0.532759	14	15	92.98	504.8	5.3	436	3548	308.49	2764.6	14.2277	0.0122	0.0869	77.92
150000	2012	内蒙古	0	111.765617	40.817498	0.268141	0.556746	9	7	91.68	274.8	4.4	270.8	2464	258.51	2550.1	11.1526	0.0162	0.1049	103.494
210000	2012	辽宁	0	123.429440	41.835441	0.303507	0.559113	8	6	103.53	707.9	9	598.7	4375	473.18	4291.3	16.1806	0.015	0.1082	98.0869
220000	2012	吉林	0	125.325990	43.896536	0.221248	0.541542	11	11	87.23	364.6	4.7	285.5	2698	240.62	2257	13.5137	0.0165	0.0892	83.6546
230000	2012	黑龙江	0	126.661669	45.742347	0.154779	0.523686	20	20	87.91	435.8	6.1	471	3724	297.38	2663.9	11.7025	0.013	0.0799	71.5333
310000	2012	上海	1	121.473701	31.230416	0.565696	0.602204	2	2	150.77	541	8.6	555.7	2399	447.09	3008.3	22.5511	0.0155	0.1864	125.398
320000	2012	江苏	1	118.763232	32.061707	0.311061	0.554663	6	8	122.03	1350.7	10.8	830.9	8120	914.62	7471.4	16.6342	0.013	0.1126	92.0123
330000	2012	浙江	1	120.152791	30.267446	0.446472	0.583353	3	3	146.35	1152.6	14.1	1070.1	5685	809.89	6442.6	20.2744	0.0132	0.1425	113.326
340000	2012	安徽	1	117.284922	31.861184	0.0814064	0.506675	27	28	96.63	507	4.5	436.8	5978	372.23	3609.8	8.4811	0.0103	0.0623	60.3847
350000	2012	福建	0	119.295144	26.100779	0.360589	0.565042	5	5	123.21	738	5.3	637.9	3841	514.22	4049.2	19.2137	0.0083	0.1339	105.421
360000	2012	江西	1	115.909228	28.675696	0.0741379	0.504214	28	29	91.93	372	4.3	385.8	4475	278.74	2573.4	8.3128	0.0111	0.0623	57.5061
370000	2012	山东	0	117.020359	36.668530	0.173921	0.528608	16	17	100.35	1364.1	9.1	1110.2	9708	797.48	7588.9	14.0513	0.0082	0.0821	78.1716
410000	2012	河南	0	113.753602	34.765515	0.0619006	0.502806	30	31	83.68	927.6	6.3	881.2	9532	610.87	5787.6	9.7314	0.0071	0.0641	60.7176
420000	2012	湖北	1	114.341861	30.546498	0.161327	0.52815	19	18	101.42	708	5.6	598	5781	438.74	4554.1	12.247	0.0094	0.0759	78.777
430000	2012	湖南	1	112.983810	28.112444	0.109885	0.513937	25	24	93.71	604.4	7.1	567.5	6590	442.52	4262	9.1715	0.0125	0.0672	64.6737
440000	2012	广东	0	113.266530	23.132191	0.435722	0.578038	4	4	127.06	1903.6	18.6	1304	11041	1766.38	12468	17.2412	0.0143	0.16	112.925
450000	2012	广西	0	108.327546	22.815478	0.117523	0.512594	24	25	89.35	507.1	4.4	358	4694	342.22	2884.1	10.8032	0.0123	0.0729	61.4423
460000	2012	海南	0	110.349228	20.017377	0.217223	0.534908	12	13	102.94	95.5	1	90.1	910	97.11	775.6	10.4945	0.0111	0.1067	85.2308
500000	2012	重庆	1	106.551556	29.563009	0.166576	0.523102	18	21	100.02	388.1	3.9	353.2	2975	245.72	2069.6	13.0454	0.011	0.0826	69.5664
510000	2012	四川	1	104.075931	30.651651	0.127084	0.515614	23	22	100.13	823	6	640.9	8085	619.93	5498.2	10.1793	0.0094	0.0767	68.0049
520000	2012	贵州	1	106.707410	26.598194	0.0586089	0.50414	31	30	75.87	243.9	2.5	269.5	3587	244.12	2321.4	6.7996	0.0093	0.0681	64.717
530000	2012	云南	1	102.710002	25.045806	0.0907007	0.507464	26	27	84.43	375.5	4.3	392.7	4631	345.19	2895.8	8.1084	0.0109	0.0745	62.5308
540000	2012	西藏	0	91.117212	29.646922	0.127622	0.514648	22	23	68.53	17.1	0.3	25.2	315	33.01	235.5	5.4286	0.0119	0.1048	74.7619
610000	2012	陕西	0	108.954239	34.265472	0.245146	0.546135	10	10	98.24	439.6	7.8	411.2	3787	355.07	3264.8	11.6081	0.019	0.0938	86.2107
620000	2012	甘肃	0	103.826308	36.059421	0.0693355	0.507941	29	26	76.29	163.3	2	211.3	2550	180	1763.5	6.4039	0.0095	0.0706	69.1569
630000	2012	青海	0	101.780199	36.620901	0.179045	0.538356	15	12	61.47	49.9	0.9	61.7	571	54.46	537.2	8.7391	0.0146	0.0954	94.0806
640000	2012	宁夏	0	106.258754	38.471317	0.167502	0.531596	17	16	87.13	60.9	0.6	67.4	659	61.11	591	9.2413	0.0089	0.0927	89.6813
650000	2012	新疆	0	87.627704	43.793026	0.200841	0.534045	13	14	82.45	255	2.6	288.8	2253	246.61	2010.6	11.3182	0.009	0.1095	89.241
110000	2013	北京	0	116.407526	39.904030	0.992234	0.72388	1	1	215.62	480.4	58.2	742.3	2125	594	3373.8	22.6071	0.0784	0.2795	158.767
120000	2013	天津	0	117.200983	39.084158	0.256367	0.558819	9	11	175.26	188.4	3.6	302.4	1410	183.78	1323.2	13.3617	0.0119	0.1303	93.844
130000	2013	河北	0	114.468664	38.037057	0.161136	0.545581	21	18	144.98	1031.6	8.6	653.4	7288	651.66	6006.2	14.1548	0.0132	0.0894	82.4122
140000	2013	山西	0	112.562398	37.873531	0.186741	0.551129	16	14	144.22	521.3	6	464	3535	358.16	3105.5	14.7468	0.0129	0.1013	87.8501
150000	2013	内蒙古	0	111.765617	40.817498	0.259785	0.575299	8	8	146.59	284.4	5.9	303.8	2455	293.71	2690.6	11.5845	0.0194	0.1196	109.597
210000	2013	辽宁	0	123.429440	41.835441	0.299892	0.578904	7	6	160.07	726.9	12.7	689.1	4365	532.06	4583.6	16.6529	0.0184	0.1219	105.008
220000	2013	吉林	0	125.325990	43.896536	0.212041	0.559206	12	10	138.36	379.6	6.7	338.4	2668	269.63	2372.1	14.2279	0.0198	0.1011	88.9093
230000	2013	黑龙江	0	126.661669	45.742347	0.159608	0.545456	22	19	141.4	459.6	7.1	467.8	3666	338.16	3020.4	12.5368	0.0152	0.0922	82.3895
310000	2013	上海	1	121.473701	31.230416	0.64913	0.640885	2	2	222.14	511.1	21.7	618.8	2448	533.16	3200.7	20.8783	0.0351	0.2178	130.748
320000	2013	江苏	1	118.763232	32.061707	0.347385	0.578869	6	7	180.98	1431.3	30.5	1503.3	8192	1133.21	7942	17.4719	0.0203	0.1383	96.9482
330000	2013	浙江	1	120.152791	30.267446	0.449962	0.60389	4	4	205.77	1242.7	15.4	1071.6	5784	955.58	7071.8	21.4851	0.0144	0.1652	122.265
340000	2013	安徽	1	117.284922	31.861184	0.0891975	0.523161	27	30	150.83	546.8	6.2	519.7	5988	476.44	3958.9	9.1316	0.0119	0.0796	66.1139
350000	2013	福建	0	119.295144	26.100779	0.381194	0.585839	5	5	183.1	835.6	7	644	3885	624.34	4303.3	21.5084	0.0109	0.1607	110.767
360000	2013	江西	1	115.909228	28.675696	0.0845444	0.522261	30	31	146.13	410.1	6.3	445	4476	338.29	2806.9	9.1622	0.0142	0.0756	62.71
370000	2013	山东	0	117.020359	36.668530	0.200878	0.552378	14	13	159.3	1465.1	17.5	1290.6	9746	946.39	8333.4	15.0328	0.0136	0.0971	85.5058
410000	2013	河南	0	113.753602	34.765515	0.0848581	0.527788	29	28	142.08	1000.5	9.5	1076	9573	745.37	7200.2	10.4513	0.0088	0.0779	75.2136
420000	2013	湖北	1	114.341861	30.546498	0.17698	0.542736	17	22	164.76	813.3	9.1	696.5	5798	536.01	4416.8	14.0273	0.0131	0.0924	76.178
430000	2013	湖南	1	112.983810	28.112444	0.103518	0.527841	26	27	147.71	702.4	7.3	601	6600	535.02	4570	10.6424	0.0121	0.0811	69.2424
440000	2013	广东	0	113.266530	23.132191	0.466436	0.60813	3	3	184.78	2081.7	33.3	1967	11270	2176.09	14706.1	18.4712	0.0169	0.1931	130.489
450000	2013	广西	0	108.327546	22.815478	0.114235	0.529894	25	25	141.46	559.6	5.2	403	4731	405.7	3285.6	11.8284	0.0129	0.0858	69.4483
460000	2013	海南	0	110.349228	20.017377	0.229816	0.555626	11	12	158.26	110.9	1.3	98.8	920	117.56	858.3	12.0543	0.0132	0.1278	93.2935
500000	2013	重庆	1	106.551556	29.563009	0.192119	0.544651	15	20	159.86	438.8	4.9	402	3011	318.47	2380.8	14.5732	0.0122	0.1058	79.0701
510000	2013	四川	1	104.075931	30.651651	0.168416	0.543846	18	21	153.04	835.2	15.6	846.2	8109	759.54	6283.3	10.2997	0.0184	0.0937	77.4855
520000	2013	贵州	1	106.707410	26.598194	0.0635704	0.523439	31	29	121.22	292.4	3.4	296.7	3632	309.13	2662.6	8.0507	0.0115	0.0851	73.3095
530000	2013	云南	1	102.710002	25.045806	0.116437	0.531831	24	24	137.9	404.7	6.6	428.1	4641	429.38	3395.8	8.7201	0.0154	0.0925	73.1696
540000	2013	西藏	0	91.117212	29.646922	0.133846	0.536253	23	23	115.1	19.1	0.5	31	317	39.65	265.6	6.0252	0.0161	0.1251	83.7855
610000	2013	陕西	0	108.954239	34.265472	0.237384	0.561698	10	9	148.37	506.2	9.5	505.3	3804	440.81	3512.5	13.307	0.0188	0.1159	92.337
620000	2013	甘肃	0	103.826308	36.059421	0.085184	0.52882	28	26	128.39	192.2	3.1	256.6	2537	227.33	1976.2	7.5759	0.0121	0.0896	77.8952
630000	2013	青海	0	101.780199	36.620901	0.161519	0.550466	20	15	118.01	54.9	1	64.2	571	64.53	542.4	9.6147	0.0156	0.113	94.9912
640000	2013	宁夏	0	106.258754	38.471317	0.168084	0.548264	19	17	136.74	71.1	0.8	72.2	666	75.71	627.2	10.6757	0.0111	0.1137	94.1742
650000	2013	新疆	0	87.627704	43.793026	0.20195	0.549884	13	16	143.4	293	2.9	309.5	2285	298.29	2133.9	12.8228	0.0094	0.1305	93.3873
110000	2014	北京	0	116.407526	39.904030	0.990622	0.756255	1	1	235.36	482.4	61.1	755.9	2171	686.67	4076.4	22.2202	0.0808	0.3163	187.766
120000	2014	天津	0	117.200983	39.084158	0.248059	0.566589	8	12	200.16	208.8	3.8	295.5	1429	207.53	1351.8	14.6116	0.0129	0.1452	94.5976
130000	2014	河北	0	114.468664	38.037057	0.139978	0.552141	22	21	160.76	1127.6	8.6	656.2	7323	728.09	6229.1	15.3981	0.0131	0.0994	85.0621
140000	2014	山西	0	112.562398	37.873531	0.175575	0.561844	17	14	167.66	571.1	5.5	452.1	3528	394.57	3332.3	16.1876	0.0122	0.1118	94.4529
150000	2014	内蒙古	0	111.765617	40.817498	0.217528	0.575933	11	8	172.56	316.8	5	301.5	2449	316.57	2634.6	12.9359	0.0166	0.1293	107.579
210000	2014	辽宁	0	123.429440	41.835441	0.286147	0.585372	7	6	187.61	772.1	13	665.2	4358	587.8	4535.6	17.7168	0.0195	0.1349	104.075
220000	2014	吉林	0	125.325990	43.896536	0.213246	0.574304	12	9	165.62	414.9	6.6	334.4	2642	297.54	2612.3	15.704	0.0197	0.1126	98.8759
230000	2014	黑龙江	0	126.661669	45.742347	0.176581	0.56511	16	13	167.8	484.6	7.6	450.9	3608	385.92	3457.8	13.4313	0.0169	0.107	95.837
310000	2014	上海	1	121.473701	31.230416	0.628662	0.651497	2	2	239.53	532.2	24.8	648.9	2467	595.48	3292.7	21.5728	0.0382	0.2414	133.47
320000	2014	江苏	1	118.763232	32.061707	0.324623	0.581909	6	7	204.16	1523.4	29	1602.4	8281	1321.33	8070.4	18.3963	0.0181	0.1596	97.4568
330000	2014	浙江	1	120.152791	30.267446	0.431061	0.611028	3	4	224.45	1276.1	16.4	1102.7	5890	1143.87	7370.6	21.6655	0.0149	0.1942	125.138
340000	2014	安徽	1	117.284922	31.861184	0.102974	0.534896	25	29	180.59	563.8	7.4	521.7	5997	549.18	4215.9	9.4014	0.0142	0.0916	70.3002
350000	2014	福建	0	119.295144	26.100779	0.348555	0.588731	5	5	202.59	899.2	7.1	654.6	3945	694.26	4276.7	22.7934	0.0108	0.176	108.408
360000	2014	江西	1	115.909228	28.675696	0.0950655	0.531914	28	31	175.69	434.2	7.2	465.3	4480	394.38	2938.5	9.692	0.0155	0.088	65.5915
370000	2014	山东	0	117.020359	36.668530	0.184607	0.559017	15	16	181.88	1523.9	17	1266.3	9808	1066.84	8664.1	15.5373	0.0134	0.1088	88.3371
410000	2014	河南	0	113.753602	34.765515	0.0837653	0.537097	29	25	166.65	1087.9	9.7	1108.9	9645	894.52	7712.9	11.2794	0.0087	0.0927	79.9679
420000	2014	湖北	1	114.341861	30.546498	0.184997	0.553147	14	20	190.14	869.7	10.5	706.8	5816	620.43	4606.8	14.9536	0.0149	0.1067	79.2091
430000	2014	湖南	1	112.983810	28.112444	0.102201	0.534952	26	28	167.27	744.9	7.6	597.9	6611	663.67	4726.1	11.2676	0.0127	0.1004	71.4884
440000	2014	广东	0	113.266530	23.132191	0.426782	0.612384	4	3	201.53	2174.1	34.6	1973.3	11489	2493.54	14943.4	18.9233	0.0175	0.217	130.067
450000	2014	广西	0	108.327546	22.815478	0.10195	0.537043	27	26	166.12	592.4	4.5	401.5	4770	465.87	3553.8	12.4193	0.0112	0.0977	74.5031
460000	2014	海南	0	110.349228	20.017377	0.218044	0.566683	10	11	179.62	120.3	1.6	101.5	936	128.75	907.4	12.8526	0.0158	0.1376	96.9444
500000	2014	重庆	1	106.551556	29.563009	0.188983	0.554478	13	17	184.71	475.4	4.7	414.5	3043	370.88	2589.9	15.6227	0.0113	0.1219	85.1101
510000	2014	四川	1	104.075931	30.651651	0.170005	0.553806	18	19	173.82	883.1	16.3	808.7	8139	909.59	6608.5	10.8502	0.0202	0.1118	81.1955
520000	2014	贵州	1	106.707410	26.598194	0.0612184	0.532941	31	30	154.62	310.9	3.3	304.7	3677	353.92	2885.3	8.4553	0.0108	0.0963	78.4689
530000	2014	云南	1	102.710002	25.045806	0.110439	0.539775	24	24	164.05	424.9	5.2	419.6	4653	538.9	3748.5	9.1317	0.0124	0.1158	80.5609
540000	2014	西藏	0	91.117212	29.646922	0.121338	0.546453	23	23	143.91	22.1	0.5	32.5	325	45.43	291.8	6.8	0.0154	0.1398	89.7846
610000	2014	陕西	0	108.954239	34.265472	0.243869	0.571689	9	10	178.73	552.4	10.4	516.5	3827	520.66	3607.2	14.4343	0.0201	0.136	94.2566
620000	2014	甘肃	0	103.826308	36.059421	0.0794293	0.53625	30	27	159.76	213.9	2.8	264.7	2531	264.01	2058.6	8.4512	0.0106	0.1043	81.3354
630000	2014	青海	0	101.780199	36.620901	0.143898	0.554424	21	18	145.93	61.4	0.9	63.2	576	77.21	544	10.6597	0.0142	0.134	94.4444
640000	2014	宁夏	0	106.258754	38.471317	0.169378	0.560602	19	15	165.26	78.2	0.8	73.2	678	91.89	688.3	11.5339	0.0109	0.1355	101.519
650000	2014	新疆	0	87.627704	43.793026	0.159283	0.549318	20	22	163.67	305.7	2.8	316.6	2325	329.03	2077.4	13.1484	0.0088	0.1415	89.3505
110000	2015	北京	0	116.407526	39.904030	0.960648	0.767991	1	1	276.38	491.9	68	777.3	2188	923.36	3944.4	22.4817	0.0875	0.422	180.274
120000	2015	天津	0	117.200983	39.084158	0.221683	0.580054	8	10	237.53	249.8	4.4	294.8	1439	261	1369.7	17.3593	0.0149	0.1814	95.1842
130000	2015	河北	0	114.468664	38.037057	0.0944061	0.56128	23	21	199.53	1317.2	8.8	643.6	7345	866.46	6135.6	17.9333	0.0137	0.118	83.5344
140000	2015	山西	0	112.562398	37.873531	0.135325	0.572514	19	16	206.3	723.9	5.5	440.3	3519	472.8	3241.4	20.5712	0.0125	0.1344	92.1114
150000	2015	内蒙古	0	111.765617	40.817498	0.169181	0.576944	12	11	214.55	365.7	5	298.3	2440	377.07	2377.1	14.9877	0.0168	0.1545	97.4221
210000	2015	辽宁	0	123.429440	41.835441	0.239261	0.592963	7	7	226.4	860.5	13.3	618.4	4338	729.4	4289.8	19.8363	0.0215	0.1681	98.8889
220000	2015	吉林	0	125.325990	43.896536	0.1612	0.580447	14	9	208.2	427.3	6.6	325.1	2613	351.13	2511.5	16.3529	0.0203	0.1344	96.1156
230000	2015	黑龙江	0	126.661669	45.742347	0.136106	0.572734	18	15	209.93	519.5	7.4	433.5	3529	459.29	3329.8	14.7209	0.0171	0.1301	94.3553
310000	2015	上海	1	121.473701	31.230416	0.580581	0.658611	2	2	278.11	568.8	25.4	637.2	2458	778.76	3132.4	23.1408	0.0399	0.3168	127.437
320000	2015	江苏	1	118.763232	32.061707	0.322557	0.601966	5	5	244.01	2346.3	28.3	1552.1	8315	1800.47	7993.1	28.2177	0.0182	0.2165	96.1287
330000	2015	浙江	1	120.152791	30.267446	0.437921	0.631436	3	3	264.85	1906.8	17.1	1083.4	5985	1613.54	7283.7	31.8596	0.0158	0.2696	121.699
340000	2015	安徽	1	117.284922	31.861184	0.0850426	0.548597	25	25	211.28	913.3	7.7	513.8	6011	707.27	4188.3	15.1938	0.015	0.1177	69.6773
350000	2015	福建	0	119.295144	26.100779	0.306147	0.600834	6	6	245.21	1044.8	9	663.1	3984	860.61	4154	26.2249	0.0136	0.216	104.267
360000	2015	江西	1	115.909228	28.675696	0.0810179	0.545972	26	29	208.35	710.9	6.7	480.5	4485	550.37	3030.4	15.8506	0.0139	0.1227	67.5674
370000	2015	山东	0	117.020359	36.668530	0.152934	0.575768	16	13	220.66	1980.8	17.4	1236.7	9866	1269.06	9088.8	20.077	0.0141	0.1286	92.1224
410000	2015	河南	0	113.753602	34.765515	0.0653813	0.547822	30	27	205.34	1489	10.4	1125.9	9701	1164.37	7537.4	15.3489	0.0092	0.12	77.6971
420000	2015	湖北	1	114.341861	30.546498	0.151277	0.562869	17	19	226.75	1014.4	11.5	712.3	5850	828.34	4530.5	17.3402	0.0161	0.1416	77.4444
430000	2015	湖南	1	112.983810	28.112444	0.0667834	0.543891	29	30	206.38	910.5	7.2	579.1	6615	802.51	4692	13.7642	0.0124	0.1213	70.9297
440000	2015	广东	0	113.266530	23.132191	0.386212	0.620799	4	4	240.95	2682.7	35.3	1948	11678	3150.03	14479.7	22.9723	0.0181	0.2697	123.991
450000	2015	广西	0	108.327546	22.815478	0.0755938	0.547179	27	28	207.23	715.8	4.4	405.4	4811	607.89	3594.9	14.8784	0.0109	0.1264	74.7225
460000	2015	海南	0	110.349228	20.017377	0.205697	0.5764	10	12	230.33	149.5	1.5	100.4	945	171.31	894.1	15.8201	0.0149	0.1813	94.6138
500000	2015	重庆	1	106.551556	29.563009	0.167083	0.570281	13	17	221.84	602.7	4.7	415.6	3070	493.55	2737.7	19.6319	0.0113	0.1608	89.1759
510000	2015	四川	1	104.075931	30.651651	0.175339	0.574853	11	14	215.48	1424	18.3	795.5	8196	1159.02	6798.3	17.3743	0.023	0.1414	82.9466
520000	2015	贵州	1	106.707410	26.598194	0.0491017	0.543048	31	31	193.29	386.8	3.3	307.5	3708	481.39	2941.5	10.4315	0.0107	0.1298	79.3285
530000	2015	云南	1	102.710002	25.045806	0.103935	0.549336	22	24	203.76	537.3	4.9	414.7	4663	757.28	3740.1	11.5226	0.0118	0.1624	80.208
540000	2015	西藏	0	91.117212	29.646922	0.0885507	0.548464	24	26	186.38	29.6	0.5	33.4	330	53.79	268.7	8.9697	0.015	0.163	81.4242
610000	2015	陕西	0	108.954239	34.265472	0.216671	0.58188	9	8	216.12	689.9	10.2	511.8	3846	699.49	3567.1	17.9381	0.0199	0.1819	92.7483
620000	2015	甘肃	0	103.826308	36.059421	0.0754724	0.549566	28	23	199.78	302.7	2.7	261.8	2523	349.29	2105.3	11.9976	0.0103	0.1384	83.4443
630000	2015	青海	0	101.780199	36.620901	0.134453	0.561892	20	20	195.15	82.3	0.8	62.7	577	101.65	517.1	14.2634	0.0128	0.1762	89.6187
640000	2015	宁夏	0	106.258754	38.471317	0.156024	0.564541	15	18	214.7	92.5	0.8	73.1	684	123.23	636.6	13.5234	0.0109	0.1802	93.0702
650000	2015	新疆	0	87.627704	43.793026	0.121066	0.558093	21	22	205.49	409.5	2.9	317.2	2385	382.55	2028.4	17.1698	0.0091	0.1604	85.0482
110000	2016	北京	0	116.407526	39.904030	0.934754	0.759508	1	1	286.37	475.8	69.2	791.5	2195	593.08	3869	21.6765	0.0874	0.2702	176.264
120000	2016	天津	0	117.200983	39.084158	0.256333	0.592729	8	9	245.838	283.9	4.8	286	1443	183.09	1499.8	19.6743	0.0168	0.1269	103.936
130000	2016	河北	0	114.468664	38.037057	0.131745	0.578446	20	16	214.359	1612	8.4	639.6	7375	623.2	7121	21.8576	0.0131	0.0845	96.5559
140000	2016	山西	0	112.562398	37.873531	0.150429	0.576887	19	18	224.811	747.2	5	430.6	3514	328.73	3365.7	21.2635	0.0116	0.0935	95.7797
150000	2016	内蒙古	0	111.765617	40.817498	0.180129	0.583382	14	14	229.926	417.2	4.8	293.2	2436	249.64	2470.8	17.1264	0.0164	0.1025	101.429
210000	2016	辽宁	0	123.429440	41.835441	0.25786	0.599874	7	7	231.411	971.7	12.6	560.4	4327	512.71	4427.1	22.4567	0.0225	0.1185	102.313
220000	2016	吉林	0	125.325990	43.896536	0.178572	0.587726	15	10	217.074	440	6.4	322.1	2567	264.31	2654.8	17.1406	0.0199	0.103	103.42
230000	2016	黑龙江	0	126.661669	45.742347	0.152033	0.580457	18	15	221.886	575.1	7.3	424.9	3463	320.28	3445.6	16.607	0.0172	0.0925	99.4975
310000	2016	上海	1	121.473701	31.230416	0.599119	0.663016	2	2	282.224	635.7	26.8	627.8	2467	509.97	3156.1	25.7681	0.0427	0.2067	127.933
320000	2016	江苏	1	118.763232	32.061707	0.349018	0.607628	5	5	253.753	2685.2	27.3	1497.3	8381	1206.6	8198.8	32.0391	0.0182	0.144	97.826
330000	2016	浙江	1	120.152791	30.267446	0.4684	0.633795	3	3	268.105	2159.7	18.6	1060.9	6072	1116.48	7225.9	35.5682	0.0175	0.1839	119.004
340000	2016	安徽	1	117.284922	31.861184	0.109493	0.556159	23	26	228.778	1075	8	517.1	6033	489.54	4343	17.8187	0.0155	0.0811	71.9874
350000	2016	福建	0	119.295144	26.100779	0.321366	0.60203	6	6	252.671	1144.6	9.1	668.8	4016	588.52	4159	28.501	0.0136	0.1465	103.561
360000	2016	江西	1	115.909228	28.675696	0.0919933	0.549805	25	31	223.755	822.5	5.6	471.5	4496	386.54	3140.7	18.294	0.0119	0.086	69.8554
370000	2016	山东	0	117.020359	36.668530	0.180174	0.585805	13	12	232.566	2366.5	18.2	1215.5	9973	863.38	9594.5	23.7291	0.015	0.0866	96.2048
410000	2016	河南	0	113.753602	34.765515	0.0868694	0.557219	26	23	223.123	1767.2	12.2	1145	9778	757.67	7889	18.0732	0.0107	0.0775	80.6811
420000	2016	湖北	1	114.341861	30.546498	0.15965	0.568687	17	21	239.855	1131.9	12.3	719.3	5885	515.29	4683.8	19.2336	0.0171	0.0876	79.5888
430000	2016	湖南	1	112.983810	28.112444	0.0812018	0.552157	28	28	217.691	1066.9	7.4	568.4	6625	555.75	4993.6	16.1042	0.013	0.0839	75.3751
440000	2016	广东	0	113.266530	23.132191	0.378507	0.620916	4	4	247.996	2779.4	43.5	1957.6	11908	1991.31	14349	23.3406	0.0222	0.1672	120.499
450000	2016	广西	0	108.327546	22.815478	0.0775808	0.551985	29	29	223.325	790	4.2	401.4	4857	388.96	3774.2	16.2652	0.0105	0.0801	77.7064
460000	2016	海南	0	110.349228	20.017377	0.227921	0.584433	10	13	231.559	186.5	1.6	101.2	957	125.95	942.3	19.488	0.0158	0.1316	98.4639
500000	2016	重庆	1	106.551556	29.563009	0.191115	0.5773	11	17	233.888	704.7	4.6	412.9	3110	349.01	2880.1	22.6592	0.0111	0.1122	92.6077
510000	2016	四川	1	104.075931	30.651651	0.189663	0.586678	12	11	225.415	1851.2	18.4	787.5	8251	714.93	7294.5	22.4361	0.0234	0.0866	88.4075
520000	2016	贵州	1	106.707410	26.598194	0.0602599	0.550013	31	30	209.455	459.5	3.6	310.5	3758	336.23	3082.7	12.2272	0.0116	0.0895	82.0303
530000	2016	云南	1	102.710002	25.045806	0.10994	0.556583	22	25	217.338	655.3	5	419	4677	500.98	3942.8	14.0111	0.0119	0.1071	84.3019		搜 索“马 克 数 据 网”
540000	2016	西藏	0	91.117212	29.646922	0.0822641	0.555886	27	27	204.733	40.2	0.5	31.5	340	32.95	284.4	11.8235	0.0159	0.0969	83.6471
610000	2016	陕西	0	108.954239	34.265472	0.240918	0.593074	9	8	229.367	803	11.2	511.4	3874	464.99	3813.3	20.7279	0.0219	0.12	98.4331
620000	2016	甘肃	0	103.826308	36.059421	0.072554	0.557071	30	24	204.111	392.9	2.7	261	2520	232.05	2203.8	15.5913	0.0103	0.0921	87.4524
630000	2016	青海	0	101.780199	36.620901	0.131041	0.569164	21	20	200.382	99.7	0.9	63.1	582	67.21	539.8	17.1306	0.0143	0.1155	92.7491
640000	2016	宁夏	0	106.258754	38.471317	0.174373	0.575603	16	19	212.356	111.9	0.8	70.7	695	94.73	716.4	16.1007	0.0113	0.1363	103.079
650000	2016	新疆	0	87.627704	43.793026	0.108715	0.561866	24	22	208.722	468.4	2.9	320.5	2428	252.85	2132.1	19.2916	0.009	0.1041	87.813
110000	2017	北京	0	116.407526	39.904030	0.920847	0.779462	1	1	329.944	541.9	77.4	812.9	2194	870.58	3752.1	24.6992	0.0952	0.3968	171.016
120000	2017	天津	0	117.200983	39.084158	0.288691	0.618081	8	8	284.034	339.3	5.3	269.5	1410	300.67	1580.1	24.0638	0.0197	0.2132	112.064
130000	2017	河北	0	114.468664	38.037057	0.156339	0.598596	22	18	258.167	1910.1	7.5	535.3	7409	1096.19	7581.8	25.7808	0.014	0.148	102.332
140000	2017	山西	0	112.562398	37.873531	0.163537	0.596379	21	19	259.955	872.9	4.9	428.7	3510	584.21	3647.9	24.8689	0.0114	0.1664	103.929
150000	2017	内蒙古	0	111.765617	40.817498	0.213425	0.609761	14	10	258.504	494	4.8	280.6	2433	491.17	2841.2	20.3042	0.0171	0.2019	116.778
210000	2017	辽宁	0	123.429440	41.835441	0.269185	0.620778	9	7	267.176	1058.6	12.9	519.5	4312	873.25	4755.7	24.5501	0.0248	0.2025	110.29
220000	2017	吉林	0	125.325990	43.896536	0.205307	0.609722	16	11	254.765	501.5	6.3	307.1	2526	486.1	2868.8	19.8535	0.0205	0.1924	113.571
230000	2017	黑龙江	0	126.661669	45.742347	0.181805	0.602977	18	16	256.78	664.6	8.2	413	3399	597.31	3657.1	19.5528	0.0199	0.1757	107.593
310000	2017	上海	1	121.473701	31.230416	0.604531	0.688646	2	2	336.651	681.3	30.7	632.3	2466	693.79	3298.7	27.6277	0.0486	0.2813	133.767
320000	2017	江苏	1	118.763232	32.061707	0.3828	0.630804	5	5	297.688	3106.1	27.9	1484.6	8423	2066.5	8807.7	36.8764	0.0188	0.2453	104.567
330000	2017	浙江	1	120.152791	30.267446	0.511421	0.659664	3	3	318.052	2464.6	23	1054.5	6170	1794.18	7590.6	39.9449	0.0218	0.2908	123.024
340000	2017	安徽	1	117.284922	31.861184	0.129151	0.577991	25	23	271.596	1323.7	8.2	516.2	6057	831.8	4884.3	21.8541	0.0159	0.1373	80.6389
350000	2017	福建	0	119.295144	26.100779	0.343991	0.623663	6	6	299.282	1373.6	10.8	672.5	4065	908.95	4295	33.7909	0.0161	0.2236	105.658
360000	2017	江西	1	115.909228	28.675696	0.115143	0.571391	27	30	267.168	997.1	6.3	463.5	4511	661.48	3449.2	22.1037	0.0136	0.1466	76.462
370000	2017	山东	0	117.020359	36.668530	0.184799	0.600112	17	17	272.059	2588.7	18.9	1192.9	10033	1499	9943.9	25.8019	0.0158	0.1494	99.1119
410000	2017	河南	0	113.753602	34.765515	0.124588	0.57787	26	24	266.924	2128.4	13.2	1129.3	9829	1484.62	8553.4	21.6543	0.0117	0.151	87.0221
420000	2017	湖北	1	114.341861	30.546498	0.17233	0.585701	20	22	285.277	1242.9	12.7	695	5904	857.64	4994.1	21.0518	0.0183	0.1453	84.5884
430000	2017	湖南	1	112.983810	28.112444	0.0967388	0.573618	29	28	261.118	1315.5	6.9	565.7	6633	929.11	5683.4	19.8327	0.0122	0.1401	85.6837
440000	2017	广东	0	113.266530	23.132191	0.430367	0.642164	4	4	296.168	3246.8	49.9	1963.1	12141	3579.7	14796.2	26.7424	0.0254	0.2948	121.87
450000	2017	广西	0	108.327546	22.815478	0.0990746	0.574378	28	27	261.938	968	4	398	4907	711.65	4385.1	19.7269	0.0101	0.145	89.3642
460000	2017	海南	0	110.349228	20.017377	0.294847	0.609065	7	12	275.64	228.7	1.9	100.9	972	251.27	1007.5	23.5288	0.0188	0.2585	103.652
500000	2017	重庆	1	106.551556	29.563009	0.230991	0.604112	12	15	276.306	866.9	4.8	406.4	3144	611.48	3274.9	27.5732	0.0118	0.1945	104.163
510000	2017	四川	1	104.075931	30.651651	0.208454	0.606516	15	13	267.797	2167.5	20.1	792.2	8289	1245.99	7693.6	26.1491	0.0254	0.1503	92.817
520000	2017	贵州	1	106.707410	26.598194	0.135956	0.573453	23	29	251.457	568.6	3.8	315.2	3803	836.12	3485.6	14.9514	0.0121	0.2199	91.654
530000	2017	云南	1	102.710002	25.045806	0.174188	0.577054	19	25	256.273	812.6	5.2	422.4	4693	1143.47	4228.4	17.3152	0.0123	0.2437	90.1001
540000	2017	西藏	0	91.117212	29.646922	0.0571475	0.569174	31	31	245.57	61.2	0.5	33.3	349	45.21	290.3	17.5358	0.015	0.1295	83.1805
610000	2017	陕西	0	108.954239	34.265472	0.260885	0.614614	11	9	266.846	903.2	11.6	510.4	3904	836	4220.6	23.1352	0.0227	0.2141	108.11
620000	2017	甘肃	0	103.826308	36.059421	0.132151	0.588187	24	21	243.78	576.4	2.9	259.2	2522	456.19	2526.4	22.8549	0.0112	0.1809	100.174
630000	2017	青海	0	101.780199	36.620901	0.216102	0.595085	13	20	240.203	120.1	0.9	63.3	586	161.68	610.9	20.4949	0.0142	0.2759	104.249
640000	2017	宁夏	0	106.258754	38.471317	0.2659	0.604193	10	14	255.588	159.2	0.8	71.1	705	204.87	792	22.5816	0.0113	0.2906	112.34
650000	2017	新疆	0	87.627704	43.793026	0.075967	0.575655	30	26	248.688	569.9	2.8	335	2480	333.28	2252.3	22.9798	0.0084	0.1344	90.8185
110000	2018	北京	0	116.407526	39.904030	0.935266	0.824629	1	1	368.537	638.8	84	819.3	2192	1755.46	4009.2	29.1423	0.1025	0.8008	182.901
120000	2018	天津	0	117.200983	39.084158	0.320833	0.656612	6	6	316.885	437.9	6.4	260	1383	737.82	1648.5	31.6631	0.0246	0.5335	119.197
130000	2018	河北	0	114.468664	38.037057	0.14716	0.623189	19	18	282.772	2159.8	8.4	550.3	7426	2790.14	8195.6	29.0843	0.0153	0.3757	110.364
140000	2018	山西	0	112.562398	37.873531	0.138684	0.620456	24	20	283.654	991	4.9	425.8	3502	1372.93	3961.5	28.2981	0.0115	0.392	113.121
150000	2018	内蒙古	0	111.765617	40.817498	0.20727	0.639361	15	12	271.567	628.3	4.9	272.4	2422	1270.77	3044.4	25.9414	0.018	0.5247	125.698
210000	2018	辽宁	0	123.429440	41.835441	0.214059	0.637987	14	13	290.951	1136	12.8	501.6	4291	1774.96	4880.7	26.474	0.0255	0.4136	113.743
220000	2018	吉林	0	125.325990	43.896536	0.178058	0.633056	16	15	276.075	588.2	5.8	279.3	2484	1077.8	3001.1	23.6795	0.0208	0.4339	120.817
230000	2018	黑龙江	0	126.661669	45.742347	0.134737	0.62514	25	17	274.735	810.7	8	392.7	3327	1131.53	3833.6	24.3673	0.0204	0.3401	115.227
310000	2018	上海	1	121.473701	31.230416	0.617546	0.733293	2	2	377.734	772.9	35.6	640.7	2475	1436.34	3722.3	31.2283	0.0556	0.5803	150.396
320000	2018	江苏	1	118.763232	32.061707	0.372709	0.664739	5	5	334.021	3351.9	32	1472.6	8446	4814.66	9794	39.6862	0.0217	0.5701	115.96
330000	2018	浙江	1	120.152791	30.267446	0.473815	0.688952	3	3	357.445	2653.8	21.8	1013.5	6273	4101.33	8308.8	42.3051	0.0215	0.6538	132.453
340000	2018	安徽	1	117.284922	31.861184	0.142349	0.607207	21	24	303.83	1662.4	9.3	592.3	6076	2260.95	5535.8	27.3601	0.0157	0.3721	91.1093
350000	2018	福建	0	119.295144	26.100779	0.31911	0.652345	7	7	334.436	1629.1	12.3	705.4	4104	2026.23	4553.5	39.6954	0.0174	0.4937	110.953
360000	2018	江西	1	115.909228	28.675696	0.116504	0.602989	28	29	296.228	1323.4	5.5	435.7	4513	1609.18	4043.5	29.3242	0.0126	0.3566	89.5967
370000	2018	山东	0	117.020359	36.668530	0.162938	0.620715	18	19	301.13	2884.8	18	1129	10077	3659.14	10569.6	28.6276	0.0159	0.3631	104.888
410000	2018	河南	0	113.753602	34.765515	0.127222	0.604456	27	26	295.756	2503.9	12.8	967.3	9864	3950.31	9354.1	25.3842	0.0132	0.4005	94.8307
420000	2018	湖北	1	114.341861	30.546498	0.174872	0.614376	17	22	319.477	1480.7	13.5	653.3	5917	2040.03	5569.8	25.0245	0.0207	0.3448	94.1322
430000	2018	湖南	1	112.983810	28.112444	0.0977626	0.600358	29	30	286.809	1635.3	6.8	546.3	6635	2477.1	6302.9	24.6466	0.0124	0.3733	94.9947
440000	2018	广东	0	113.266530	23.132191	0.422544	0.681277	4	4	331.918	3597.8	60.8	1994.1	12348	7798.43	16823.3	29.1367	0.0305	0.6316	136.243
450000	2018	广西	0	108.327546	22.815478	0.129722	0.609032	26	23	289.248	1230.6	4.9	386.8	4947	2053.66	5045.3	24.8757	0.0127	0.4151	101.987
460000	2018	海南	0	110.349228	20.017377	0.288601	0.64187	8	9	309.718	279.1	2.2	99.6	982	569.24	1085.3	28.4216	0.0221	0.5797	110.519
500000	2018	重庆	1	106.551556	29.563009	0.229432	0.637157	12	14	301.532	1070.1	4.9	391.2	3163	1543.52	3650.7	33.8318	0.0125	0.488	115.419
510000	2018	四川	1	104.075931	30.651651	0.221323	0.639544	13	11	294.304	2624.5	19.3	780.6	8321	3297.15	9068.6	31.5407	0.0247	0.3962	108.984
520000	2018	贵州	1	106.707410	26.598194	0.140454	0.604063	23	27	276.91	732	3.5	308.5	3822	2193.37	3940.4	19.1523	0.0113	0.5739	103.098
530000	2018	云南	1	102.710002	25.045806	0.141639	0.603875	22	28	285.791	1019.4	4.9	427	4703	2478.73	4659.1	21.6755	0.0115	0.5271	99.0666
540000	2018	西藏	0	91.117212	29.646922	0.0311488	0.585139	31	31	274.334	78.2	0.4	36.9	354	112.47	312.3	22.0904	0.0108	0.3177	88.2203
610000	2018	陕西	0	108.954239	34.265472	0.286611	0.649683	9	8	295.948	1057.4	12.7	493.2	3931	2215.91	4688.6	26.899	0.0258	0.5637	119.272
620000	2018	甘肃	0	103.826308	36.059421	0.143112	0.619533	20	21	266.823	742.8	3	246.7	2515	1194.2	2736	29.5348	0.0122	0.4748	108.787
630000	2018	青海	0	101.780199	36.620901	0.23371	0.6326	11	16	263.124	152.9	0.9	62.7	587	422.81	686.4	26.0477	0.0144	0.7203	116.934
640000	2018	宁夏	0	106.258754	38.471317	0.241811	0.640919	10	10	272.923	217	0.8	68	710	462.92	881	30.5634	0.0118	0.652	124.085
650000	2018	新疆	0	87.627704	43.793026	0.0769308	0.606592	30	25	271.84	647.3	3.1	305.2	2520	856.18	2703.8	25.6865	0.0102	0.3398	107.294
110000	2019	北京	0	116.407526	39.904030	0.915113	0.854853	1	1	399.003	688.1	85.9	791.3	2190	2681.99	4019.8	31.4201	0.1086	1.2247	183.553
120000	2019	天津	0	117.200983	39.084158	0.344377	0.683445	6	6	344.112	523.6	6.6	269.4	1385	1194.6	1704.7	37.8051	0.0245	0.8625	123.083
130000	2019	河北	0	114.468664	38.037057	0.161786	0.642785	20	19	305.06	2359.7	10.1	576	7447	4741.94	8315.6	31.6866	0.0175	0.6368	111.664
140000	2019	山西	0	112.562398	37.873531	0.15682	0.640361	21	21	308.726	1126.1	5.2	441.1	3497	2375.2	3987.2	32.2019	0.0118	0.6792	114.018
150000	2019	内蒙古	0	111.765617	40.817498	0.185604	0.654634	16	13	293.889	682.5	4.7	280.9	2415	2075.81	3011.7	28.2609	0.0167	0.8595	124.708
210000	2019	辽宁	0	123.429440	41.835441	0.200918	0.654405	14	14	311.012	1230.4	13.7	499.9	4277	2723.21	4883.6	28.7678	0.0274	0.6367	114.183
220000	2019	吉林	0	125.325990	43.896536	0.146273	0.644525	22	17	292.774	618.3	5.6	277.3	2448	1769.31	2897.6	25.2574	0.0202	0.7228	118.366
230000	2019	黑龙江	0	126.661669	45.742347	0.138789	0.64754	25	16	292.869	848.3	8.8	349.6	3255	1732.45	3929	26.0614	0.0252	0.5322	120.707
310000	2019	上海	1	121.473701	31.230416	0.641618	0.768761	2	2	410.281	890.1	41.8	716.1	2481	2240.43	4007.9	35.8767	0.0584	0.903	161.544
320000	2019	江苏	1	118.763232	32.061707	0.395954	0.690221	4	5	361.927	3585.7	32.4	1332.3	8469	7545.4	10165.9	42.3391	0.0243	0.8909	120.037
330000	2019	浙江	1	120.152791	30.267446	0.498506	0.716783	3	3	387.488	2778.9	24.4	987.3	6375	6717.01	8736.4	43.5906	0.0247	1.0536	137.042
340000	2019	安徽	1	117.284922	31.861184	0.166806	0.629854	19	26	330.29	1864.7	9.3	581	6092	4006.72	5844.2	30.609	0.016	0.6577	95.9324
350000	2019	福建	0	119.295144	26.100779	0.33523	0.672613	7	7	360.509	1779	10.8	639.6	4137	3235.45	4720.3	43.0022	0.0169	0.7821	114.1
360000	2019	江西	1	115.909228	28.675696	0.130936	0.620998	28	31	319.13	1448.8	5.5	451.7	4516	2838.5	4157.1	32.0815	0.0122	0.6285	92.0527
370000	2019	山东	0	117.020359	36.668530	0.167206	0.637488	18	22	327.361	3186.1	17.3	1072	10106	5786.39	10785.5	31.5268	0.0161	0.5726	106.724
410000	2019	河南	0	113.753602	34.765515	0.139802	0.627771	24	27	322.121	2769.2	16.6	968	9901	5999.12	9841.1	27.9689	0.0171	0.6059	99.395
420000	2019	湖北	1	114.341861	30.546498	0.21091	0.641249	13	20	344.403	1708.3	18.1	653.8	5927	3370.84	5688	28.8223	0.0277	0.5687	95.9676
430000	2019	湖南	1	112.983810	28.112444	0.117339	0.623854	31	29	310.85	1873.8	8.1	596.7	6640	4248.82	6648.1	28.2199	0.0136	0.6399	100.122
440000	2019	广东	0	113.266530	23.132191	0.393614	0.697144	5	4	360.608	3801.6	66.2	2064.6	12489	12046.4	16533	30.4396	0.0321	0.9646	132.381
450000	2019	广西	0	108.327546	22.815478	0.129575	0.626906	29	28	309.913	1447.4	4.5	404.1	4982	3587.75	5127.5	29.0526	0.0111	0.7201	102.921
460000	2019	海南	0	110.349228	20.017377	0.269104	0.662772	9	9	328.752	323.2	2.2	102.2	995	873.99	1135.6	32.4824	0.0215	0.8784	114.131
500000	2019	重庆	1	106.551556	29.563009	0.237809	0.655566	10	12	325.471	1164	4.7	374.4	3188	2603	3678.8	36.5119	0.0126	0.8165	115.395
510000	2019	四川	1	104.075931	30.651651	0.223424	0.657844	12	10	317.11	2811.7	20	788.9	8351	5164.95	9443.5	33.669	0.0254	0.6185	113.082
520000	2019	贵州	1	106.707410	26.598194	0.138747	0.630131	26	24	293.511	892.9	4	321.1	3848	3874.72	4049.7	23.2043	0.0125	1.0069	105.242
530000	2019	云南	1	102.710002	25.045806	0.142461	0.629881	23	25	303.461	1156.1	5.3	367.5	4714	4185.22	4863	24.5248	0.0144	0.8878	103.161
540000	2019	西藏	0	91.117212	29.646922	0.126852	0.622396	30	30	293.791	91.4	0.9	44.8	361	301.37	321.4	25.3186	0.0201	0.8348	89.0305
610000	2019	陕西	0	108.954239	34.265472	0.271756	0.667893	8	8	322.891	1197.7	13.4	501.3	3944	3366.91	4640.5	30.3676	0.0267	0.8537	117.66
620000	2019	甘肃	0	103.826308	36.059421	0.168398	0.644013	17	18	289.14	870.7	3.7	253	2509	1958.88	2751.2	34.7031	0.0146	0.7807	109.653
630000	2019	青海	0	101.780199	36.620901	0.190049	0.64867	15	15	282.646	174.5	0.9	67	590	636.98	673.1	29.5763	0.0134	1.0796	114.085
640000	2019	宁夏	0	106.258754	38.471317	0.226074	0.656328	11	11	292.312	259.1	0.8	70	717	743.92	828.3	36.1367	0.0114	1.0375	115.523
650000	2019	新疆	0	87.627704	43.793026	0.133941	0.632639	27	23	294.341	775.9	3.6	318.8	2559	2006	2745	30.3204	0.0113	0.7839	107.269
110000	2020	北京	0	116.407526	39.904030	0.906077	0.885892	1	1	417.875	747.3	92.3	739.9	2189	3247.63	3906.4	34.1389	0.1247	1.4836	178.456
120000	2020	天津	0	117.200983	39.084158	0.34899	0.700398	6	5	361.455	534.6	7	255.3	1387	1584.54	1711	38.5436	0.0274	1.1424	123.36
130000	2020	河北	0	114.468664	38.037057	0.165289	0.655273	22	19	322.697	2534.4	10.4	561.2	7464	5971.71	8336	33.955	0.0185	0.8001	111.683
140000	2020	山西	0	112.562398	37.873531	0.172087	0.655848	19	18	325.727	1252.1	5.2	442.6	3490	3091.7	4022.8	35.8768	0.0117	0.8859	115.266
150000	2020	内蒙古	0	111.765617	40.817498	0.16951	0.665823	20	14	309.394	722.9	4.6	270.6	2403	2584.73	2962.2	30.0832	0.017	1.0756	123.271
210000	2020	辽宁	0	123.429440	41.835441	0.198495	0.668081	14	13	326.294	1331.2	13.9	476.8	4255	3388.94	4873.8	31.2855	0.0292	0.7965	114.543
220000	2020	吉林	0	125.325990	43.896536	0.117895	0.652208	31	22	308.256	654.2	4.4	257.8	2399	2119.9	2870.1	27.2697	0.0171	0.8837	119.637
230000	2020	黑龙江	0	126.661669	45.742347	0.129799	0.65937	30	16	306.075	886.3	8.6	316.4	3171	2092.5	3844.4	27.9502	0.0272	0.6599	121.236
310000	2020	上海	1	121.473701	31.230416	0.667123	0.804347	2	2	431.928	919	44.8	645.6	2488	2824.19	4277.6	36.9373	0.0694	1.1351	171.929
320000	2020	江苏	1	118.763232	32.061707	0.38634	0.699559	4	6	381.613	3756.8	32.8	1342.5	8477	9188.72	9897.1	44.3176	0.0244	1.084	116.752
330000	2020	浙江	1	120.152791	30.267446	0.491393	0.729815	3	3	406.878	2938.8	28.3	1025.8	6468	8309.99	8585.2	45.436	0.0276	1.2848	132.733
340000	2020	安徽	1	117.284922	31.861184	0.187235	0.647378	15	27	350.165	2093	9.7	565.6	6105	5053.59	6025.6	34.2834	0.0171	0.8278	98.6994
350000	2020	福建	0	119.295144	26.100779	0.328629	0.682128	7	8	380.126	1831	10.3	605.9	4161	3908.46	4739.3	44.0038	0.017	0.9393	113.898
360000	2020	江西	1	115.909228	28.675696	0.136239	0.632968	29	31	340.611	1510.5	5.5	451.5	4519	3537.88	4249.4	33.4255	0.0122	0.7829	94.0341
370000	2020	山东	0	117.020359	36.668530	0.179811	0.651339	16	23	347.806	3445.6	19.9	1098.3	10165	7198.8	10907.1	33.8967	0.0181	0.7082	107.3
410000	2020	河南	0	113.753602	34.765515	0.16283	0.645962	23	28	340.813	3090.9	18.3	964.9	9941	8156.78	10051.4	31.0924	0.019	0.8205	101.111
420000	2020	湖北	1	114.341861	30.546498	0.209755	0.6544	13	21	358.636	1870.2	16.4	631.2	5745	4205.17	5681.1	32.5535	0.026	0.732	98.8877
430000	2020	湖南	1	112.983810	28.112444	0.140409	0.640593	27	30	332.035	2113.2	8.5	604.9	6645	5671.25	6719.4	31.8014	0.0141	0.8535	101.12
440000	2020	广东	0	113.266530	23.132191	0.362124	0.704111	5	4	379.535	3890	74	2085.3	12624	15025.3	15536.9	30.8143	0.0355	1.1902	123.074
450000	2020	广西	0	108.327546	22.815478	0.161198	0.649688	24	24	325.171	1650.8	5.9	410.4	5019	4826.86	5332.9	32.891	0.0144	0.9617	106.254
460000	2020	海南	0	110.349228	20.017377	0.262399	0.675743	9	9	344.049	351.5	2.4	108.5	1012	1146.73	1135.2	34.7332	0.0221	1.1331	112.174
500000	2020	重庆	1	106.551556	29.563009	0.244148	0.669248	10	12	344.764	1228.4	5.9	370.8	3209	3190.23	3640.1	38.2798	0.0159	0.9942	113.434
510000	2020	四川	1	104.075931	30.651651	0.23889	0.671545	11	11	334.823	2975.5	23.7	861.8	8371	7526.73	9124.6	35.5453	0.0275	0.8991	109.002
520000	2020	贵州	1	106.707410	26.598194	0.13877	0.648807	28	25	307.937	1002.4	4.6	335.3	3858	5077.83	4093.5	25.9824	0.0137	1.3162	106.104
530000	2020	云南	1	102.710002	25.045806	0.146488	0.648058	26	26	318.478	1278.1	5.3	358.2	4722	5647.84	4953.4	27.0669	0.0148	1.1961	104.9
540000	2020	西藏	0	91.117212	29.646922	0.150563	0.644653	25	29	310.529	96.3	1.1	41.7	366	429.09	321.9	26.3115	0.0264	1.1724	87.9508
610000	2020	陕西	0	108.954239	34.265472	0.277794	0.684069	8	7	342.042	1369	14	489.6	3955	4148.73	4589.7	34.6144	0.0286	1.049	116.048
620000	2020	甘肃	0	103.826308	36.059421	0.168825	0.654503	21	20	305.5	931.4	3.6	262.2	2501	2557.64	2673.8	37.2411	0.0137	1.0226	106.909
630000	2020	青海	0	101.780199	36.620901	0.173599	0.660887	18	15	298.227	182	0.9	66.4	593	827.54	659.4	30.6914	0.0136	1.3955	111.197
640000	2020	宁夏	0	106.258754	38.471317	0.229813	0.672596	12	10	310.016	283.6	0.8	69.1	721	924.34	839.2	39.3343	0.0116	1.282	116.394
650000	2020	新疆	0	87.627704	43.793026	0.175403	0.657523	17	17	308.349	883.9	4	323	2590	3092.05	2846.6	34.1274	0.0124	1.1938	109.907
110000	2021	北京	0	116.407526	39.904030	0.882148	0.864503	1	1	445.441	806.3	101.2	759.5	2189	512.96	3972	36.8342	0.1332	0.2343	181.453
120000	2021	天津	0	117.200983	39.084158	0.380029	0.686822	5	4	395.735	584.5	8.3	256.4	1373	207.71	1745.1	42.571	0.0324	0.1513	127.101
130000	2021	河北	0	114.468664	38.037057	0.17907	0.648555	19	14	352.44	2796.9	12.2	566	7448	756.64	8643.5	37.5524	0.0216	0.1016	116.051
140000	2021	山西	0	112.562398	37.873531	0.174452	0.640761	20	18	359.701	1350.4	5	442.9	3480	374.63	4126	38.8046	0.0113	0.1077	118.563
150000	2021	内蒙古	0	111.765617	40.817498	0.148324	0.645249	23	15	344.759	796.2	4.6	267.7	2400	296.92	3016.9	33.175	0.0172	0.1237	125.704
210000	2021	辽宁	0	123.429440	41.835441	0.186624	0.657556	17	10	357.235	1464.9	13.9	458	4229	414.06	4975.2	34.6394	0.0303	0.0979	117.645
220000	2021	吉林	0	125.325990	43.896536	0.10117	0.640604	28	19	339.413	734.2	4.5	254.7	2375	244.07	2966.5	30.9137	0.0177	0.1028	124.905
230000	2021	黑龙江	0	126.661669	45.742347	0.0912268	0.639163	29	21	341.139	1013.5	5.8	311.2	3125	246.83	3759.5	32.432	0.0186	0.079	120.304
310000	2021	上海	1	121.473701	31.230416	0.720721	0.79203	2	2	458.97	995.4	50.7	683.1	2489	574.58	4398.8	39.992	0.0742	0.2308	176.73
320000	2021	江苏	1	118.763232	32.061707	0.425403	0.682434	4	6	412.921	4071.6	34.6	1314	8505	1328.81	10179.5	47.873	0.0263	0.1562	119.688
330000	2021	浙江	1	120.152791	30.267446	0.502666	0.706564	3	3	434.609	3117	32.8	1034.6	6540	1105.39	8859.6	47.6606	0.0317	0.169	135.468
340000	2021	安徽	1	117.284922	31.861184	0.192547	0.636154	16	24	384.624	2335.8	10	563.2	6113	602.42	6192.6	38.2104	0.0178	0.0985	101.302
350000	2021	福建	0	119.295144	26.100779	0.357206	0.666616	6	7	410.313	1985.1	10.7	579	4187	530.53	4824.3	47.411	0.0185	0.1267	115.221
360000	2021	江西	1	115.909228	28.675696	0.148084	0.625449	24	29	372.174	1700.2	5.7	448	4517	428	4496.8	37.64	0.0127	0.0948	99.5528
370000	2021	山东	0	117.020359	36.668530	0.202357	0.644974	14	16	380.683	3863.7	21	1108.3	10170	1016.13	11248.5	37.9912	0.0189	0.0999	110.605
410000	2021	河南	0	113.753602	34.765515	0.167803	0.636718	22	23	374.374	3505.8	18.2	915.4	9883	994.71	10352.6	35.473	0.0199	0.1006	104.752
420000	2021	湖北	1	114.341861	30.546498	0.201564	0.644486	15	17	391.902	2081.3	17.3	643.6	5830	528.89	5871.1	35.6998	0.0269	0.0907	100.705
430000	2021	湖南	1	112.983810	28.112444	0.12676	0.627793	27	28	362.365	2323	8.9	606	6622	636.5	6942.3	35.08	0.0147	0.0961	104.837
440000	2021	广东	0	113.266530	23.132191	0.335885	0.684739	7	5	406.531	4277.7	80.6	2110.9	12684	1932.37	16267.8	33.7252	0.0382	0.1523	128.255
450000	2021	广西	0	108.327546	22.815478	0.143094	0.632409	25	25	355.114	1827.4	5.9	410.3	5037	536.25	5511.4	36.2795	0.0144	0.1065	109.418
460000	2021	海南	0	110.349228	20.017377	0.306383	0.663551	8	9	375.354	450.2	2.8	113.7	1020	135.77	1158.9	44.1373	0.0246	0.1331	113.618
500000	2021	重庆	1	106.551556	29.563009	0.23991	0.651158	11	12	373.223	1338.5	5.7	358.1	3212	374.15	3751.1	41.6719	0.0159	0.1165	116.784
510000	2021	四川	1	104.075931	30.651651	0.232429	0.657169	12	11	363.608	3220.9	25.3	871.5	8372	947.43	9338.9	38.4723	0.029	0.1132	111.549
520000	2021	贵州	1	106.707410	26.598194	0.0812403	0.623529	31	30	340.798	1187.4	4.6	336.7	3852	437.54	4269.9	30.8255	0.0137	0.1136	110.849
530000	2021	云南	1	102.710002	25.045806	0.088148	0.623028	30	31	346.931	1451.9	5.3	358.1	4690	523.73	5045.7	30.9574	0.0148	0.1117	107.584
540000	2021	西藏	0	91.117212	29.646922	0.169726	0.62854	21	27	342.1	115.3	1.3	44.5	366	61.85	333.4	31.5027	0.0292	0.169	91.0929
610000	2021	陕西	0	108.954239	34.265472	0.26185	0.666355	9	8	374.157	1567.4	13	476	3954	442.8	4777.8	39.6409	0.0273	0.112	120.835
620000	2021	甘肃	0	103.826308	36.059421	0.18066	0.63697	18	22	341.158	1025.2	3.5	261.3	2490	300.63	2744.7	41.1727	0.0134	0.1207	110.229
630000	2021	青海	0	101.780199	36.620901	0.141342	0.631944	26	26	329.889	209.4	0.9	67.1	594	86.14	680.5	35.2525	0.0134	0.145	114.562
640000	2021	宁夏	0	106.258754	38.471317	0.245866	0.650881	10	13	344.862	317.1	1	70.7	725	104.64	866.1	43.7379	0.0141	0.1443	119.462
650000	2021	新疆	0	87.627704	43.793026	0.205809	0.640557	13	20	341.768	1064.2	4.1	324.2	2589	371.43	2965.4	41.1047	0.0126	0.1435	114.538
