# Supplementary material for: Coupled coordination relationship and enhancement path between digital economy and essential public health services in China
Source: Front Public Health. 2025 May 7;13:1517353. doi: 10.3389/fpubh.2025.1517353 (PMC12092431; doi:10.3389/fpubh.2025.1517353)
Supplement: Supplementary file 2 [file Table_2.xlsx]

## Sheet: Sheet1
		基本公共卫生服务得分	数字经济水平	耦合协调度D值
2012	北京	0.0416485	0.99987	0.839	良好协调
2012	天津	0.0187753	0.303508	0.226	中度失调
2012	河北	0.0370045	0.153318	0.477	濒临失调
2012	山西	0.0265302	0.195207	0.447	濒临失调
2012	内蒙古	0.0243271	0.268141	0.219	中度失调
2012	辽宁	0.0339798	0.303507	0.508	勉强协调
2012	吉林	0.0213368	0.221248	0.205	中度失调
2012	黑龙江	0.0261414	0.154779	0.403	濒临失调
2012	上海	0.0323649	0.565696	0.61	初级协调
2012	江苏	0.0422608	0.311061	0.607	初级协调
2012	浙江	0.0430997	0.446472	0.676	初级协调
2012	安徽	0.0246691	0.0814064	0.133	严重失调
2012	福建	0.0304224	0.360589	0.536	勉强协调
2012	江西	0.0281997	0.0741379	0.269	中度失调
2012	山东	0.0493699	0.173921	0.552	勉强协调
2012	河南	0.0425682	0.0619006	0.266	中度失调
2012	湖北	0.039076	0.161327	0.489	濒临失调
2012	湖南	0.0420962	0.109885	0.42	濒临失调
2012	广东	0.0633081	0.435722	0.796	中级协调
2012	广西	0.0339256	0.117523	0.369	轻度失调
2012	海南	0.0151222	0.217223	0.205	中度失调
2012	重庆	0.0305365	0.166576	0.422	濒临失调
2012	四川	0.0519008	0.127084	0.499	濒临失调
2012	贵州	0.0287166	0.0586089	0.225	中度失调
2012	云南	0.0274238	0.0907007	0.32	轻度失调
2012	陕西	0.0317105	0.245146	0.48	濒临失调
2012	甘肃	0.0229972	0.0693355	0.12	严重失调
2012	青海	0.0257239	0.179045	0.431	濒临失调
2012	宁夏	0.0198925	0.167502	0.188	严重失调
2012	新疆	0.0448718	0.200841	0.528	勉强协调
2013	北京	0.050532	0.992234	0.924	优质协调
2013	天津	0.0228068	0.256367	0.216	中度失调
2013	河北	0.0354928	0.161136	0.489	濒临失调
2013	山西	0.0412052	0.186741	0.519	勉强协调
2013	内蒙古	0.0241291	0.259785	0.216	中度失调
2013	辽宁	0.0327801	0.299892	0.508	勉强协调
2013	吉林	0.021258	0.212041	0.202	中度失调
2013	黑龙江	0.0265972	0.159608	0.413	濒临失调
2013	上海	0.0405599	0.64913	0.748	中级协调
2013	江苏	0.0428499	0.347385	0.629	初级协调
2013	浙江	0.0431241	0.449962	0.676	初级协调
2013	安徽	0.021365	0.0891975	0.143	严重失调
2013	福建	0.0289118	0.381194	0.544	勉强协调
2013	江西	0.0252119	0.0845444	0.298	中度失调
2013	山东	0.0470105	0.200878	0.584	勉强协调
2013	河南	0.0381901	0.0848581	0.352	轻度失调
2013	湖北	0.0360977	0.17698	0.51	勉强协调
2013	湖南	0.0410353	0.103518	0.401	濒临失调
2013	广东	0.063455	0.466436	0.811	良好协调
2013	广西	0.0318257	0.114235	0.355	轻度失调
2013	海南	0.0193416	0.229816	0.208	中度失调
2013	重庆	0.0283244	0.192119	0.439	濒临失调
2013	四川	0.046982	0.168416	0.552	勉强协调
2013	贵州	0.0283216	0.0635704	0.225	中度失调
2013	云南	0.0261315	0.116437	0.369	轻度失调
2013	陕西	0.0299278	0.237384	0.474	濒临失调
2013	甘肃	0.019577	0.085184	0.143	严重失调
2013	青海	0.0240573	0.161519	0.184	严重失调
2013	宁夏	0.0213976	0.168084	0.188	严重失调
2013	新疆	0.0415012	0.20195	0.528	勉强协调
2014	北京	0.0451092	0.990622	0.924	优质协调
2014	天津	0.0177041	0.248059	0.214	中度失调
2014	河北	0.0355923	0.139978	0.465	濒临失调
2014	山西	0.0271914	0.175575	0.431	濒临失调
2014	内蒙古	0.0242414	0.217528	0.205	中度失调
2014	辽宁	0.0347243	0.286147	0.502	勉强协调
2014	吉林	0.0221118	0.213246	0.202	中度失调
2014	黑龙江	0.0253776	0.176581	0.431	濒临失调
2014	上海	0.0353645	0.628662	0.741	中级协调
2014	江苏	0.0446723	0.324623	0.612	初级协调
2014	浙江	0.0442689	0.431061	0.667	初级协调
2014	安徽	0.0233803	0.102974	0.151	严重失调
2014	福建	0.0290226	0.348555	0.531	勉强协调
2014	江西	0.0255204	0.0950655	0.339	轻度失调
2014	山东	0.049307	0.184607	0.563	勉强协调
2014	河南	0.0422659	0.0837653	0.352	轻度失调
2014	湖北	0.0395356	0.184997	0.51	勉强协调
2014	湖南	0.040989	0.102201	0.401	濒临失调
2014	广东	0.0632771	0.426782	0.791	中级协调
2014	广西	0.0335834	0.10195	0.339	轻度失调
2014	海南	0.0176154	0.218044	0.205	中度失调
2014	重庆	0.0312757	0.188983	0.439	濒临失调
2014	四川	0.0506376	0.170005	0.552	勉强协调
2014	贵州	0.0283524	0.0612184	0.225	中度失调
2014	云南	0.026857	0.110439	0.355	轻度失调
2014	陕西	0.033262	0.243869	0.474	濒临失调
2014	甘肃	0.0198242	0.0794293	0.133	严重失调
2014	青海	0.025263	0.143898	0.393	轻度失调
2014	宁夏	0.0206971	0.169378	0.188	严重失调
2014	新疆	0.0429764	0.159283	0.489	濒临失调
2015	北京	0.0431424	0.960648	0.83	良好协调
2015	天津	0.0189601	0.221683	0.205	中度失调
2015	河北	0.0345487	0.0944061	0.32	轻度失调
2015	山西	0.0256075	0.135325	0.393	轻度失调
2015	内蒙古	0.0245217	0.169181	0.188	严重失调
2015	辽宁	0.0330576	0.239261	0.474	濒临失调
2015	吉林	0.0237988	0.1612	0.184	严重失调
2015	黑龙江	0.025565	0.136106	0.393	轻度失调
2015	上海	0.0352549	0.580581	0.725	中级协调
2015	江苏	0.0455696	0.322557	0.676	初级协调
2015	浙江	0.0443499	0.437921	0.685	初级协调
2015	安徽	0.0241597	0.0850426	0.152	严重失调
2015	福建	0.0281802	0.306147	0.524	勉强协调
2015	江西	0.025624	0.0810179	0.324	轻度失调
2015	山东	0.0478569	0.152934	0.547	勉强协调
2015	河南	0.0405806	0.0653813	0.356	轻度失调
2015	湖北	0.0395096	0.151277	0.495	濒临失调
2015	湖南	0.0414817	0.0667834	0.356	轻度失调
2015	广东	0.0623795	0.386212	0.785	中级协调
2015	广西	0.0327409	0.0755938	0.324	轻度失调
2015	海南	0.0193011	0.205697	0.208	中度失调
2015	重庆	0.0330842	0.167083	0.436	濒临失调
2015	四川	0.0496591	0.175339	0.581	勉强协调
2015	贵州	0.03004	0.0491017	0.225	中度失调
2015	云南	0.0279755	0.103935	0.359	轻度失调
2015	陕西	0.0332772	0.216671	0.474	濒临失调
2015	甘肃	0.0198862	0.0754724	0.144	严重失调
2015	青海	0.0233408	0.134453	0.177	严重失调
2015	宁夏	0.0201598	0.156024	0.19	严重失调
2015	新疆	0.0463868	0.121066	0.505	勉强协调
2016	北京	0.0429656	0.934754	0.836	良好协调
2016	天津	0.0181419	0.256333	0.222	中度失调
2016	河北	0.0359484	0.131745	0.471	濒临失调
2016	山西	0.0248529	0.150429	0.186	严重失调
2016	内蒙古	0.0242386	0.180129	0.198	严重失调
2016	辽宁	0.0328313	0.25786	0.498	濒临失调
2016	吉林	0.022231	0.178572	0.198	严重失调
2016	黑龙江	0.0265289	0.152033	0.418	濒临失调
2016	上海	0.0368325	0.599119	0.745	中级协调
2016	江苏	0.0457514	0.349018	0.71	中级协调
2016	浙江	0.0440579	0.4684	0.697	初级协调
2016	安徽	0.0245204	0.109493	0.166	严重失调
2016	福建	0.0275817	0.321366	0.529	勉强协调
2016	江西	0.0261695	0.0919933	0.343	轻度失调
2016	山东	0.0469302	0.180174	0.581	勉强协调
2016	河南	0.0397986	0.0868694	0.405	濒临失调
2016	湖北	0.0400719	0.15965	0.506	勉强协调
2016	湖南	0.0422971	0.0812018	0.383	轻度失调
2016	广东	0.0609885	0.378507	0.78	中级协调
2016	广西	0.0337415	0.0775808	0.324	轻度失调
2016	海南	0.0175147	0.227921	0.214	中度失调
2016	重庆	0.0319196	0.191115	0.452	濒临失调
2016	四川	0.0491823	0.189663	0.591	勉强协调
2016	贵州	0.0274843	0.0602599	0.271	中度失调
2016	云南	0.0301065	0.10994	0.373	轻度失调
2016	陕西	0.0334215	0.240918	0.486	濒临失调
2016	甘肃	0.0208168	0.072554	0.134	严重失调
2016	青海	0.0228544	0.131041	0.177	严重失调
2016	宁夏	0.0240337	0.174373	0.194	严重失调
2016	新疆	0.0461861	0.108715	0.488	濒临失调
2017	北京	0.0452747	0.920847	0.922	优质协调
2017	天津	0.0193993	0.288691	0.229	中度失调
2017	河北	0.0365799	0.156339	0.506	勉强协调
2017	山西	0.0249634	0.163537	0.19	严重失调
2017	内蒙古	0.0240218	0.213425	0.208	中度失调
2017	辽宁	0.0323343	0.269185	0.504	勉强协调
2017	吉林	0.021191	0.205307	0.208	中度失调
2017	黑龙江	0.0244975	0.181805	0.198	严重失调
2017	上海	0.0347198	0.604531	0.629	初级协调
2017	江苏	0.0444666	0.3828	0.657	初级协调
2017	浙江	0.0441059	0.511421	0.713	中级协调
2017	安徽	0.025355	0.129151	0.398	轻度失调
2017	福建	0.026719	0.343991	0.538	勉强协调
2017	江西	0.0257768	0.115143	0.386	轻度失调
2017	山东	0.049462	0.184799	0.581	勉强协调
2017	河南	0.0411382	0.124588	0.457	濒临失调
2017	湖北	0.0387158	0.17233	0.516	勉强协调
2017	湖南	0.0418655	0.0967388	0.425	濒临失调
2017	广东	0.0629612	0.430367	0.807	良好协调
2017	广西	0.0306665	0.0990746	0.359	轻度失调
2017	海南	0.02172	0.294847	0.229	中度失调
2017	重庆	0.0327772	0.230991	0.48	濒临失调
2017	四川	0.0509556	0.208454	0.61	初级协调
2017	贵州	0.0293689	0.135956	0.408	濒临失调
2017	云南	0.0299734	0.174188	0.436	濒临失调
2017	陕西	0.0334065	0.260885	0.498	濒临失调
2017	甘肃	0.0208548	0.132151	0.177	严重失调
2017	青海	0.0242448	0.216102	0.211	中度失调
2017	宁夏	0.021393	0.2659	0.224	中度失调
2017	新疆	0.041092	0.075967	0.383	轻度失调
2018	北京	0.0430933	0.935266	0.839	良好协调
2018	天津	0.0178084	0.320833	0.235	中度失调
2018	河北	0.0370028	0.14716	0.495	濒临失调
2018	山西	0.0255672	0.138684	0.408	濒临失调
2018	内蒙古	0.0242253	0.20727	0.208	中度失调
2018	辽宁	0.0321994	0.214059	0.467	濒临失调
2018	吉林	0.0201137	0.178058	0.198	严重失调
2018	黑龙江	0.022062	0.134737	0.177	严重失调
2018	上海	0.0344312	0.617546	0.635	初级协调
2018	江苏	0.0459544	0.372709	0.721	中级协调
2018	浙江	0.044835	0.473815	0.697	初级协调
2018	安徽	0.0252526	0.142349	0.408	濒临失调
2018	福建	0.0287491	0.31911	0.529	勉强协调
2018	江西	0.025794	0.116504	0.386	轻度失调
2018	山东	0.0484922	0.162938	0.559	勉强协调
2018	河南	0.0426833	0.127222	0.471	濒临失调
2018	湖北	0.0392504	0.174872	0.516	勉强协调
2018	湖南	0.0415648	0.0977626	0.425	濒临失调
2018	广东	0.0626835	0.422544	0.802	良好协调
2018	广西	0.0327579	0.129722	0.398	轻度失调
2018	海南	0.022298	0.288601	0.225	中度失调
2018	重庆	0.0320364	0.229432	0.466	濒临失调
2018	四川	0.0494513	0.221323	0.599	勉强协调
2018	贵州	0.0298605	0.140454	0.378	轻度失调
2018	云南	0.0302166	0.141639	0.378	轻度失调
2018	陕西	0.0336504	0.286611	0.505	勉强协调
2018	甘肃	0.0195005	0.143112	0.168	严重失调
2018	青海	0.0232735	0.23371	0.207	中度失调
2018	宁夏	0.021765	0.241811	0.211	中度失调
2018	新疆	0.0434273	0.0769308	0.266	中度失调
2019	北京	0.0453581	0.915113	0.927	优质协调
2019	天津	0.0181272	0.344377	0.237	中度失调
2019	河北	0.0363932	0.161786	0.477	濒临失调
2019	山西	0.0262338	0.15682	0.403	濒临失调
2019	内蒙古	0.0224777	0.185604	0.193	严重失调
2019	辽宁	0.0292616	0.200918	0.442	濒临失调
2019	吉林	0.0203444	0.146273	0.174	严重失调
2019	黑龙江	0.0230853	0.138789	0.168	严重失调
2019	上海	0.0345481	0.641618	0.641	初级协调
2019	江苏	0.0447041	0.395954	0.662	初级协调
2019	浙江	0.042457	0.498506	0.707	中级协调
2019	安徽	0.0273415	0.166806	0.414	濒临失调
2019	福建	0.0287897	0.33523	0.532	勉强协调
2019	江西	0.0272312	0.130936	0.363	轻度失调
2019	山东	0.0486998	0.167206	0.541	勉强协调
2019	河南	0.042862	0.139802	0.447	濒临失调
2019	湖北	0.038676	0.21091	0.533	勉强协调
2019	湖南	0.0437962	0.117339	0.41	濒临失调
2019	广东	0.0624247	0.393614	0.779	中级协调
2019	广西	0.0323275	0.129575	0.363	轻度失调
2019	海南	0.0230031	0.269104	0.219	中度失调
2019	重庆	0.0326969	0.237809	0.473	濒临失调
2019	四川	0.0506907	0.223424	0.599	勉强协调
2019	贵州	0.0315286	0.138747	0.378	轻度失调
2019	云南	0.0302808	0.142461	0.378	轻度失调
2019	陕西	0.0326895	0.271756	0.493	濒临失调
2019	甘肃	0.0221781	0.168398	0.184	严重失调
2019	青海	0.0246774	0.190049	0.193	严重失调
2019	宁夏	0.0179886	0.226074	0.207	中度失调
2019	新疆	0.0391271	0.133941	0.43	濒临失调
2020	北京	0.0375951	0.906077	0.836	良好协调
2020	天津	0.0191773	0.34899	0.239	中度失调
2020	河北	0.0373873	0.165289	0.49	濒临失调
2020	山西	0.0282317	0.172087	0.414	濒临失调
2020	内蒙古	0.0251117	0.16951	0.414	濒临失调
2020	辽宁	0.0298649	0.198495	0.442	濒临失调
2020	吉林	0.0230186	0.117895	0.154	严重失调
2020	黑龙江	0.0227298	0.129799	0.162	严重失调
2020	上海	0.029678	0.667123	0.65	初级协调
2020	江苏	0.0440118	0.38634	0.657	初级协调
2020	浙江	0.0398097	0.491393	0.703	中级协调
2020	安徽	0.0310377	0.187235	0.433	濒临失调
2020	福建	0.0272394	0.328629	0.527	勉强协调
2020	江西	0.0276104	0.136239	0.378	轻度失调
2020	山东	0.0487182	0.179811	0.554	勉强协调
2020	河南	0.0434383	0.16283	0.477	濒临失调
2020	湖北	0.0380221	0.209755	0.533	勉强协调
2020	湖南	0.0441977	0.140409	0.447	濒临失调
2020	广东	0.059193	0.362124	0.76	中级协调
2020	广西	0.0350132	0.161198	0.477	濒临失调
2020	海南	0.0207395	0.262399	0.217	中度失调
2020	重庆	0.0325405	0.244148	0.473	濒临失调
2020	四川	0.0514395	0.23889	0.619	初级协调
2020	贵州	0.0333007	0.13877	0.378	轻度失调
2020	云南	0.0353934	0.146488	0.463	濒临失调
2020	陕西	0.0343708	0.277794	0.499	濒临失调
2020	甘肃	0.0214381	0.168825	0.184	严重失调
2020	青海	0.028467	0.173599	0.414	濒临失调
2020	宁夏	0.0193999	0.229813	0.207	中度失调
2020	新疆	0.0318249	0.175403	0.424	濒临失调
2021	北京	0.0436631	0.882148	0.829	良好协调
2021	天津	0.0219286	0.380029	0.245	中度失调
2021	河北	0.036156	0.17907	0.502	勉强协调
2021	山西	0.0264471	0.174452	0.414	濒临失调
2021	内蒙古	0.0261275	0.148324	0.391	轻度失调
2021	辽宁	0.0284266	0.186624	0.433	濒临失调
2021	吉林	0.0234346	0.10117	0.135	严重失调
2021	黑龙江	0.0222528	0.0912268	0.121	严重失调
2021	上海	0.0338814	0.720721	0.663	初级协调
2021	江苏	0.0412153	0.425403	0.676	初级协调
2021	浙江	0.0394381	0.502666	0.707	中级协调
2021	安徽	0.0275041	0.192547	0.433	濒临失调
2021	福建	0.0267069	0.357206	0.541	勉强协调
2021	江西	0.0260257	0.148084	0.391	轻度失调
2021	山东	0.0475299	0.202357	0.578	勉强协调
2021	河南	0.0424173	0.167803	0.49	濒临失调
2021	湖北	0.0381676	0.201564	0.523	勉强协调
2021	湖南	0.0443304	0.12676	0.43	濒临失调
2021	广东	0.061218	0.335885	0.746	中级协调
2021	广西	0.034302	0.143094	0.378	轻度失调
2021	海南	0.0235546	0.306383	0.23	中度失调
2021	重庆	0.0333807	0.23991	0.473	濒临失调
2021	四川	0.0513067	0.232429	0.609	初级协调
2021	贵州	0.0344061	0.0812403	0.225	中度失调
2021	云南	0.0339697	0.088148	0.273	中度失调
2021	陕西	0.0330867	0.26185	0.487	濒临失调
2021	甘肃	0.0228918	0.18066	0.189	严重失调
2021	青海	0.0287273	0.141342	0.378	轻度失调
2021	宁夏	0.0164034	0.245866	0.214	中度失调
2021	新疆	0.0311001	0.205809	0.451	濒临失调
