# Supplementary material for: Coupled coordination relationship and enhancement path between digital economy and essential public health services in China
Source: Front Public Health. 2025 May 7;13:1517353. doi: 10.3389/fpubh.2025.1517353 (PMC12092431; doi:10.3389/fpubh.2025.1517353)
Supplement: Supplementary file 3 [file Table_3.xlsx]

## Sheet: Sheet1
		医疗资源投入			健康预防服务			健康保障服务		医疗服务产出
		基层医疗卫生机构	卫生技术人员	医疗卫生机构床位数	甲乙类传染病发病率	婚前体检率	病床利用率	居民年住院率	健康检查次数	门诊人均卫生费用	新生儿就诊率	孕产妇死亡率
2012	北京	8837	9.48	100167	174.45	99	84.3	10.9	3020390	372.9	950.2	9.9
2012	天津	4095	5.45	53509	146.33	95.9	87.6	9.4	1598703	243.3	321.1	6.8
2012	河北	77177	4.32	284359	184.24	95.7	88.4	11.9	6030148	180.3	798.1	9.4
2012	山西	38443	5.53	165309	310.18	92.9	80	9.7	3040908	190	277.1	16.6
2012	内蒙古	22009	5.62	110788	323.6	97.2	82.8	10.4	1804642	191	226.6	16.7
2012	辽宁	34249	5.62	230962	230.88	98.6	87.2	12.5	4075325	216.7	641.4	10.7
2012	吉林	18804	5.24	127756	233.14	92.9	79.4	11	2071410	184.7	347.4	16.5
2012	黑龙江	19470	5.25	178210	224.87	97.7	82	11	3518879	203.7	407.9	16.8
2012	上海	4379	6.21	109784	190.71	78.2	98.4	11.6	4605091	271.4	1071	3.7
2012	江苏	28888	5	333118	121.91	100	91.9	12	11140912	199.9	1746.1	1.2
2012	浙江	28939	6.02	213286	209.14	98.6	95.4	11.4	8555225	198.3	1851.6	6.4
2012	安徽	21812	3.94	222315	197.97	84.4	88.1	11.9	4570507	168.5	577.4	15.7
2012	福建	26374	4.7	139341	287.07	96.2	92.1	13.6	3867381	154.3	817.6	14.2
2012	江西	38369	3.99	163721	206.11	94.8	94.6	14.6	3030556	161.8	446.7	12.6
2012	山东	66462	5.47	473768	114.6	96.1	85.6	14.4	10708041	186.5	1467	9.7
2012	河南	67252	4.56	393993	314.18	92.5	91.5	13.5	6923270	133.8	1115	10.2
2012	湖北	34063	5	252991	264.74	97.7	99.3	14.9	5671474	178	834.2	10.6
2012	湖南	57177	4.47	287013	242.29	95.2	96	15.9	4266270	208.6	663.2	18.8
2012	广东	44585	4.89	355274	317.55	95.7	87.1	11.5	20630956	174	3291	11.4
2012	广西	33257	4.72	168691	332.95	95.7	95.6	14.9	4097142	142.2	612.6	18.7
2012	海南	4839	5.08	30289	278.47	94.1	84.5	9.5	571040	176.7	150.2	13.6
2012	重庆	17310	4.47	130813	245.58	95.2	91.9	15.3	2836026	207	466.1	21.6
2012	四川	74215	4.82	390147	216.73	93.3	97.4	17.1	8586467	165.7	1089.2	23.1
2012	贵州	26264	3.72	139211	257.48	96.2	89.1	16.2	2415380	183.4	290.8	24.3
2012	云南	21887	3.58	194707	206.13	96.7	89.1	13.3	3438379	140.1	587.8	34.7
2012	陕西	34889	5.76	169230	225.39	97.2	89.8	13.3	3461149	171.3	663.8	13.3
2012	甘肃	25631	4.33	112296	306.4	96.8	85.6	11.4	2149334	128.8	250.4	30.7
2012	青海	5658	5.11	26018	464.44	89.3	88	13.3	427628	142.5	71.2	46.1
2012	宁夏	3904	5.29	27765	265.31	99.5	92.2	12.7	670664	143	103.2	22.8
2012	新疆	16970	6.12	131592	624.48	94.8	92.1	20.1	2978675	161.6	287.8	39.1
2013	北京	8857	15.46	104011	155.87	98.8	83.5	11.6	2988695	393.4	1012.1	6.6
2013	天津	4209	8.05	57743	143.07	95.5	84.8	9.2	1807474	260	347	9.2
2013	河北	75178	4.44	303497	181.6	95.9	88.3	12.6	5931609	191.2	916.1	10.5
2013	山西	38529	5.77	172620	296.86	90.6	80.8	10.1	24088645	206.3	290.3	11.7
2013	内蒙古	21984	6.01	120065	295.05	97.3	78.7	11.4	1657016	195.8	262.4	20.1
2013	辽宁	33521	6.01	241860	209.54	96.5	88.5	13.6	4164526	230.2	716.8	7.9
2013	吉林	18968	5.45	133245	194.96	96.2	80.6	11.2	1989135	203.7	369.5	16.4
2013	黑龙江	18883	5.49	189183	216.1	97.8	84.8	12.3	2813359	213.8	428.6	17.4
2013	上海	4439	10.97	114314	173.78	98.5	95.2	12.1	4873503	283.6	1105.9	2
2013	江苏	28815	5.63	368287	116.74	100	91.1	13.3	11992644	211.1	1951.6	1.4
2013	浙江	28655	7.3	230056	192.46	98.6	93.2	12.5	9980777	205.8	1912.2	4
2013	安徽	21872	3.66	235959	198.32	89.8	86.8	12.6	4333994	180.1	653.3	11.5
2013	福建	26151	5.44	156149	280.57	96.5	88.5	14	3783695	171	872.2	11.4
2013	江西	37425	3.94	174299	206.37	94.5	93.2	15.2	2529211	180.4	482.3	11.3
2013	山东	72108	6.21	489737	124.05	95.5	85.2	14.5	10057372	199.5	1615.8	10.1
2013	河南	67281	4.24	429810	242.13	93.3	90.7	14.1	7851861	146	1215.3	9.2
2013	湖北	34042	5.01	288169	254.81	95.9	96.5	16.4	5544692	190	874.5	10.1
2013	湖南	58519	4.52	314090	254.89	96	94.3	17.3	4301715	223.7	763.7	19.6
2013	广东	44470	6.32	378367	317.12	96.9	87.3	12.2	21095094	188.7	3596.5	9.9
2013	广西	32117	4.44	187216	289.47	96.3	97.5	17.4	3714448	154.8	670.7	17.4
2013	海南	4689	5.29	32100	313.16	94.4	84.9	10.2	657274	194	165	25.8
2013	重庆	18025	4.23	147436	254.55	95.1	89.6	17.1	2946018	229.7	512.6	15
2013	四川	75161	4.68	426635	198.29	95.6	95.4	17.9	8055658	182.7	1211.2	18.9
2013	贵州	26657	3.64	166724	261.95	96	85.2	18.7	2660932	199	355.4	26.1
2013	云南	21913	4.2	210125	206.43	97.6	85.4	14.4	3437080	152.5	660.3	28
2013	陕西	34118	6.04	185139	207.73	96.6	87.7	14.5	3854732	185.7	720.1	10.7
2013	甘肃	25514	4.33	116064	208.99	96.6	84.6	12.3	2053285	146.5	251.2	24.4
2013	青海	5701	5.66	29529	480.59	89.4	86.2	14.2	498530	159.8	71.3	36.2
2013	宁夏	3898	5.58	31134	253.33	99.2	89.7	13.9	749925	162	116.6	27.5
2013	新疆	17190	6.43	137325	618.99	94.8	88.4	20.5	3123751	181.4	308.5	34.1
2014	北京	8802	9.91	109811	165.49	98.9	83.2	12.5	3223410	415.9	1091.7	10.2
2014	天津	4419	5.6	60869	148.98	95.8	83.9	9.8	1923186	265.9	368.6	8.8
2014	河北	75623	4.76	322909	186.29	95.8	86.7	13.3	5400332	200.8	1034.7	10.7
2014	山西	39010	5.74	177442	292.45	95.1	81.1	10.7	2906312	219.8	327.2	15.6
2014	内蒙古	22053	6.17	129011	300.81	97.1	76	12	1997218	210.9	278.4	15.5
2014	辽宁	33297	5.84	255513	236.07	98.2	87.7	14.5	5167164	247.2	712.5	8.3
2014	吉林	18856	5.5	140995	203.27	95.8	80.3	12.2	2100601	221.5	399.1	17.1
2014	黑龙江	18725	5.54	201337	207.8	97.5	82.4	12.8	3107290	224.8	437.4	14.8
2014	上海	4489	6.76	117510	174.2	98.6	97.1	13.1	4832932	295.6	1170.8	9.3
2014	江苏	28921	5.76	392293	117.29	100	90.3	14.5	13051927	222.3	2134.5	1.9
2014	浙江	28673	6.82	245756	193.92	98.7	92.5	13.7	10465756	217.2	2026.5	6.2
2014	安徽	22014	4.41	252044	190.33	90.7	87.7	13.5	4574375	194.3	764.4	13.7
2014	福建	25994	5.43	164781	274.6	96.7	86.8	14	4279422	188.2	928.3	12
2014	江西	37372	4.43	186727	207.73	94.9	93.2	15.3	2944993	196.7	511.6	10.7
2014	山东	72834	6.17	500631	131.65	94.6	86.9	15.3	11029340	216	1754.8	9.3
2014	河南	66952	5.24	459338	216.68	94.2	91.2	15.3	9030722	155.8	1421.8	10.3
2014	湖北	34503	5.77	317500	246.85	96.8	96.1	18.1	6060355	204.9	969.9	11.6
2014	湖南	57637	5.07	355485	246.9	95.9	89.5	18.2	4536123	241.5	862.5	16
2014	广东	44675	5.44	405751	360.75	97	86.3	13	22017696	200.4	3611.1	8.4
2014	广西	32497	5.44	201600	280.13	99.3	95.1	17.5	4359606	165.3	720.8	14.2
2014	海南	4754	5.6	34466	326.23	95.8	80.5	10.8	663852	198.2	155.8	17.9
2014	重庆	17886	5.16	160579	250.39	96.5	88.5	18.4	3298203	251.6	571.5	17.1
2014	四川	76110	5.55	459596	182.88	95.8	92	18.5	9736200	201.4	1351.3	20.7
2014	贵州	26432	4.85	182189	254.2	95.8	82.7	18.2	2522285	216.6	402.8	22.6
2014	云南	21835	4.43	224899	208.52	98.5	85.5	15.5	3485836	165.1	750.7	26.7
2014	陕西	34202	6.69	199372	201.45	98.1	86.7	15.8	3571667	198.4	827.8	13.3
2014	甘肃	25254	4.88	122412	193.06	97.9	83.4	13.1	2100124	154.4	279.2	23
2014	青海	5878	5.82	33007	387.77	95.7	81.3	14.8	418110	171.2	76.9	44
2014	宁夏	3918	6.01	32506	268.94	99.3	87.7	14.6	852845	185.1	130.6	15.1
2014	新疆	17178	6.68	142956	611.78	94.3	86.8	21.4	3167089	195.5	340.9	33.8
2015	北京	8912	10.4	111555	150.86	98.6	80.6	12.7	3446020	440.9	1068.3	7.7
2015	天津	4618	5.9	63693	131.85	99	81.6	9.7	1945236	290.9	326.6	9.3
2015	河北	75562	5	342096	184.92	96	83.6	13.4	5699491	210.2	1046.3	8.8
2015	山西	39196	5.8	183209	268.21	95.8	76.9	10.4	3254388	230.3	322.9	14.4
2015	内蒙古	22421	6.5	133889	268.4	97.1	73.2	11.8	2335129	218	286.3	19.6
2015	辽宁	33105	6	266986	211.18	97.7	85.4	14.8	4283716	259.4	711.5	10.7
2015	吉林	19409	5.8	144500	174.26	96.5	78.5	12.4	2210087	240.3	363.2	25.8
2015	黑龙江	18386	5.6	212590	199.76	97.7	81.4	13.5	3356241	241.2	408.5	14.8
2015	上海	4480	7	122813	186.91	98.4	95.7	13.9	5215429	316	1235.8	5
2015	江苏	28841	6.1	413612	124.24	100	88.6	15.3	13186486	235.5	2331.1	1.9
2015	浙江	29431	7.3	272509	193.24	98.6	88.9	14.3	11264013	225.5	2028.8	5.5
2015	安徽	22030	4.6	267405	242.66	93	85	13.7	4832350	203.2	772.9	11.5
2015	福建	25876	5.5	173007	278.24	97	82.6	13.6	4017990	209.1	951.6	10.3
2015	江西	37066	4.6	197837	227.94	95.7	90.4	15.6	2824270	213	531.6	9
2015	山东	73041	6.3	519369	130.9	95.4	84.3	15.5	11445012	229.4	1796	9.5
2015	河南	67092	5.5	489621	204.76	94.9	87.2	15.8	7578076	164.4	1543	11.2
2015	湖北	34563	6.3	343147	251.55	96.8	92.4	18.9	6412062	214.3	1006.8	9
2015	湖南	58586	5.5	396950	244.74	96.1	86.4	19.2	4727023	253.6	907.3	14.9
2015	广东	45013	5.7	435666	313.19	97.2	83.5	13.3	22848409	216.4	3656.9	8.4
2015	广西	32216	5.7	214485	262.75	99.3	89.8	17.3	4429612	173.2	735.5	14.1
2015	海南	4714	6	38698	342.48	96	79.4	11.5	672617	215.8	159.9	15
2015	重庆	18986	5.5	176549	262.08	96.9	86.8	19.6	3619967	266.1	569.6	18.3
2015	四川	76214	5.8	488755	187.72	96	89.6	18.9	9678370	219.2	1371.7	18.6
2015	贵州	26175	5.3	196422	266.61	94.9	80.9	18	3233772	228.9	444.8	26.8
2015	云南	21833	4.8	237597	207.72	98.3	82.9	15.8	4477640	179.7	842.9	22.1
2015	陕西	34098	7	211885	200.14	98.3	83.4	16.5	4050410	211.5	845.4	11.6
2015	甘肃	25459	5	127743	188.74	97.4	82.2	13.5	2358717	169.7	309.7	19.5
2015	青海	5860	6	34546	414.3	95.2	76	14.3	487416	181.1	77.1	33.3
2015	宁夏	3981	6.2	33804	234.95	99.3	83.2	14.7	862493	203.9	122.9	14.8
2015	新疆	17075	6.9	150263	635.11	94.2	86.9	21.7	3825857	208.4	347	39.1
2016	北京	8908	10.8	117041	137.99	98.7	82.2	14.4	3426422	460.2	1198.9	8.5
2016	天津	4844	6.1	65832	129.66	97.2	82.1	10.4	2033010	299.3	386.8	8.1
2016	河北	76003	5.3	360485	178.97	96	86.3	15	6022810	214.9	1223.1	8.8
2016	山西	40288	6.1	189689	243.87	96	75.9	11.7	3516083	237.7	362.7	13.1
2016	内蒙古	22606	6.8	139236	250.37	97.2	74.7	13.1	2201690	223.4	315.4	18.3
2016	辽宁	33931	6.3	284384	200.7	97.7	83.8	15.8	4425386	272.8	802.1	8.5
2016	吉林	19589	6.1	151195	145.87	97.3	78.3	13.5	2474429	253.5	385.8	15.4
2016	黑龙江	18256	5.8	220054	181.02	97.9	82.7	14.8	3318663	244.5	444.8	16.8
2016	上海	4470	7.4	129166	184	98.4	95.8	15.2	5737489	340.4	1227.8	5.7
2016	江苏	29099	6.5	443060	114.56	100	87.3	16.4	13867956	249.9	2322.2	2.3
2016	浙江	29811	7.7	289870	195.31	98.8	89.4	15.6	10966788	238	2009.7	5.3
2016	安徽	22271	4.7	281720	205.99	94.1	84.8	14.5	5383355	216.2	828.4	14
2016	福建	26190	5.7	174767	258.79	97.2	81.9	13.8	4348107	220.6	981.5	10.1
2016	江西	36784	4.8	209097	224.09	96.1	89.4	16.2	3008157	227.6	567	8.3
2016	山东	72904	6.5	540994	137.19	95.3	85	17	11706708	241	1927	8.5
2016	河南	67174	5.7	521546	192.25	94.4	87.9	16.8	8160654	172.2	1692.4	10.5
2016	湖北	34703	6.5	360558	249.93	97.2	92	20.3	6978871	221.4	1085.8	9.1
2016	湖南	58245	5.8	425757	238.24	96.8	86	20.5	5101813	266.7	974.2	14.2
2016	广东	46033	6	465142	320.16	97.2	84	14.1	23930321	231.8	3664.3	6.1
2016	广西	32020	6	224471	254.26	99.4	88	17.8	5059251	181	779.1	14.2
2016	海南	4805	6.3	40324	321.47	96.4	78.2	12	852610	231.9	161	8.3
2016	重庆	19044	5.9	190850	263.6	97	84.4	20.7	3804708	279.4	608.3	11.1
2016	四川	76619	6	519205	184.9	96.1	90.2	20	9523114	229.4	1407.7	17.8
2016	贵州	26172	5.8	210279	254.21	94.8	78.2	18.6	3458565	229.6	475.1	20.5
2016	云南	22395	5.2	253555	187.9	98.5	83	17.2	4079082	193	913.2	23.6
2016	陕西	34017	7.6	225400	194.26	98.2	82.2	17.9	4600535	218.5	939.6	9.2
2016	甘肃	25791	5.2	134346	200.18	97.2	82.6	15.3	2498431	177.4	365	15.1
2016	青海	5908	6.2	34749	426.63	94.7	74.4	15.4	473892	192	85.8	31.9
2016	宁夏	3968	6.6	36313	225.97	99.2	84.4	15.8	837285	215	131.7	23.1
2016	新疆	17124	7.1	156912	606.7	94.5	86.5	22.3	5434964	212.6	460.4	38.5
2017	北京	9090	11.3	120645	139.61	98.7	82.4	15.1	3505329	516.8	1178.5	10.5
2017	天津	4960	6.5	68409	141.42	99.1	78.1	10.2	2348990	316.8	418.6	9.4
2017	河北	78207	5.7	395036	174.07	96.1	83.7	15.6	6274877	222.8	1338.8	11.1
2017	山西	40581	6.3	197525	236.73	95.6	77.6	12.3	3856106	240.8	423.2	12.1
2017	内蒙古	22868	7.1	150325	267.35	97.2	74.7	14.4	2251018	231.6	346.5	15.6
2017	辽宁	33540	6.7	298609	205.22	98	82	16.8	4765506	281.7	830.3	9.2
2017	吉林	19647	6.2	153657	138.74	97.4	77.6	14.1	2447222	267.1	399.1	14.6
2017	黑龙江	18398	6.1	241732	174.08	97.6	78.9	16	3460578	257	464.7	14.8
2017	上海	4574	7.7	134607	185.06	98.3	95.4	16.2	5600662	361	1320.1	3.4
2017	江苏	29118	6.8	469182	111.54	99.9	87.5	17.7	13895064	260.8	2545.1	2.2
2017	浙江	30189	8.1	313520	206.91	98.8	89.4	16.8	11660896	245	2298	5.7
2017	安徽	22635	5	305746	223.71	92.1	86.2	15.9	5585267	226.3	940	13
2017	福建	26078	5.9	182375	255.13	97.2	83.1	14.1	4891838	233.1	1036.3	8.5
2017	江西	36311	5.1	234047	232.42	96.3	85.8	17.9	2986682	238.7	598.6	9.9
2017	山东	75106	6.9	584812	144.89	94.9	83.4	18.2	12869370	244.2	2255	9.6
2017	河南	67307	6.1	558998	192.41	93.4	88.4	18.3	9361771	183.2	1910.3	9.4
2017	湖北	34756	6.8	376185	249.83	96.9	92.7	21.7	7476745	229.1	1249.6	8.6
2017	湖南	56302	6.1	452335	252.23	97.2	85.2	21.5	5519291	279.4	1056.4	13.8
2017	广东	47071	6.3	492064	346.71	97.5	84	14.6	25614732	253	3633.6	7.5
2017	广西	32034	6.2	241140	265.12	98.9	87.7	18.4	5187757	191.2	860.9	12.7
2017	海南	4846	6.5	41954	382.28	96.4	81.1	12.6	867315	246.9	171.5	17.7
2017	重庆	18748	6.2	206376	283.73	97.4	84.1	22.3	4031234	296.7	684.1	13.1
2017	四川	77487	6.4	563475	190.97	96.9	91.3	22	10586740	238	1621.5	17.5
2017	贵州	26378	6.3	232990	261.21	93.6	79.9	20.5	4297120	232.3	544.7	22.4
2017	云南	22868	5.9	274809	195.04	98.5	83.2	18.6	4592303	199.3	1040.8	23.3
2017	陕西	33808	8.1	241265	193.11	97.7	83.7	19.6	5256638	225.2	1094.7	9.5
2017	甘肃	26579	5.6	146613	194.29	97.3	81.6	16.7	2551913	190.9	420.8	17.1
2017	青海	5980	7	38321	452.07	95.8	70.6	16.3	789444	199.1	98.4	31.5
2017	宁夏	3966	7.3	39820	220.68	99.4	80.8	17.2	1128936	225.5	150.2	20
2017	新疆	17059	7.1	167577	589.41	94.7	85	22.4	5177225	221.9	459.9	31.9
2018	北京	9172	11.9	123626	131.49	98.5	83.4	16.4	3734639	544.8	1116.3	8
2018	天津	5101	6.7	68247	147.15	99	77.5	10.4	2094089	339.3	402.1	6
2018	河北	82236	6.1	421916	172.71	96.4	82.7	16.1	7253359	239.5	1356.9	8.3
2018	山西	40198	6.6	208305	237.88	95.9	79.6	13.3	4023500	255.7	458.9	13.5
2018	内蒙古	23235	7.4	159006	274.69	97.5	76.1	15.2	2658977	251	329	13.1
2018	辽宁	33777	7	314440	200.25	97.9	78.1	17	5408735	308	795	13.6
2018	吉林	21371	6.8	166994	132.5	97.2	76	15	2832820	275.9	380.8	12.9
2018	黑龙江	18460	6.1	250129	164.99	97.4	73.8	15.5	3485789	264.9	410.2	21.3
2018	上海	4729	8.1	139029	175.04	97.9	95.9	17.3	5829461	378.8	1288.6	1.1
2018	江苏	30295	7.3	491522	113.5	98.5	86.4	18	15189091	281.2	2457.5	10.4
2018	浙江	30883	8.5	332086	181.83	98.5	89.5	17.8	12862184	265.3	2344.1	4.5
2018	安徽	23076	5.3	328123	224.82	93.7	83.3	16	5511305	238.9	980.9	15.3
2018	福建	26423	6.3	192473	256.8	97.5	83.9	14.6	5302989	261.6	1076.6	9.5
2018	江西	35020	5.3	249490	230.33	96.5	86.7	18.6	3058457	256.5	607.6	8.2
2018	山东	77614	7.4	608459	157.38	95.3	82.5	18.3	13669274	253.8	2169.1	9
2018	河南	67730	6.5	608519	193.9	94.2	87.6	20	10168633	193.8	1978.9	10.4
2018	湖北	34912	6.9	393514	250.76	96.6	92.7	22.3	7916000	243.6	1280.3	9.6
2018	湖南	53788	6.3	482439	278.42	97.6	84.3	22.3	6070474	290.7	1049.3	12.7
2018	广东	48684	6.7	516929	310.94	97.1	83	15.1	27745606	281.7	3781.9	6.8
2018	广西	31826	6.5	255940	281.24	99.2	87.6	18.9	5590929	206.2	828.9	14
2018	海南	4981	6.8	44800	360.04	96.8	79.6	12.8	1006243	262.6	166.1	23.7
2018	重庆	19535	6.7	220104	240.88	97.4	82.2	22.7	4432173	320.1	710.4	15
2018	四川	78427	6.7	598898	188.98	96.6	88.7	22	11272963	256.4	1685	13.4
2018	贵州	26374	6.8	245639	259.18	94.6	81.8	22.6	4500939	236.2	584.8	23.5
2018	云南	23108	6.2	291194	197.37	97.8	85.8	19.9	4909561	214.1	1098.3	19.7
2018	陕西	33412	8.5	253711	186.31	97.4	84	20.7	5535224	243.4	1093.7	9.3
2018	甘肃	25785	6	162737	179.82	96.5	81.6	18.5	2625517	187.8	431.6	14.5
2018	青海	5994	7.4	39146	433.29	96.1	73.2	16.3	718065	217.1	101.6	29.4
2018	宁夏	4121	7.7	41005	224.4	99.2	79.9	17.6	1344067	225.1	151.1	23.3
2018	新疆	16833	7.1	178881	659.75	97.5	85.6	21.8	5384060	231.8	458.3	30.9
2019	北京	9416	12.6	127777	122.73	98.5	82.6	17.9	3962740	561.4	1130.8	10.7
2019	天津	5348	7	68262	148.71	98.2	79.8	10.9	2331966	362.3	459.3	5.1
2019	河北	81790	6.5	430079	170.65	96.8	81.3	15.7	7759746	256.5	1406.6	8.8
2019	山西	40249	6.9	218441	241.92	96.8	76.6	13.4	4693630	271.3	496	14.2
2019	内蒙古	23238	7.7	161083	269.25	97.7	71.4	14.3	3099794	271.4	357.5	10.5
2019	辽宁	32275	7.1	313847	194.98	98	73.8	16.3	5420427	329	830.5	9.9
2019	吉林	20917	7	170332	118.21	98	76.2	15	3088573	289.8	409.2	15.4
2019	黑龙江	18478	6.3	262575	157.7	98.1	74.5	16.1	3955102	281.5	407.6	23.2
2019	上海	5021	8.4	146454	177.16	98.1	96.2	18.7	5676301	404.6	1290.5	1.4
2019	江苏	31821	7.8	516015	115.99	98.3	85.7	18.9	15179015	297.4	2583.6	9.5
2019	浙江	32145	8.9	350191	175.02	98.6	88.4	18.9	12913604	278.1	2316.3	4.1
2019	安徽	24558	5.7	347395	246.83	95.7	83.1	16.3	6352414	255.2	1112.2	9.6
2019	福建	26596	6.6	202211	263.35	97.9	82.8	15.3	5806258	281.9	1150.5	8.8
2019	江西	35398	5.7	267135	232.46	97.1	84.8	19	4835305	277.4	702.1	8.1
2019	山东	79825	7.8	629722	163.44	95.7	80.7	18.5	14807333	270.6	2106.4	9.5
2019	河南	67561	6.8	640147	178.84	93.7	88.1	21	10421518	212	2036.8	11.5
2019	湖北	33919	7	403300	239.82	97.3	92.3	23.1	8238477	265.6	1417.4	9.7
2019	湖南	54859	7.3	506330	293.11	97.4	83.7	23.4	6520574	320.2	1186.4	10.4
2019	广东	51064	6.9	545196	315.37	97.3	82.2	15.8	30256878	300.2	3836.4	6.5
2019	广西	31853	6.9	277357	290.9	99.1	90	21.1	6118810	221.7	875.3	10.5
2019	海南	5057	7.2	49764	388.77	97.3	78.4	13.6	1257560	286.2	171	16.8
2019	重庆	20001	7.2	231806	237.02	98	82.2	24.1	5049144	329.9	809.9	12.1
2019	四川	80500	7.2	631763	212.59	96.9	89.4	23.7	11511682	269.8	1848.5	11.5
2019	贵州	26806	7.4	264986	250.02	96.1	81.5	23.7	4885524	252.6	662.9	19.5
2019	云南	23638	7	311899	217.05	98.1	83.8	20.8	5205791	219.1	1220.4	17.7
2019	陕西	33619	9.1	265814	180.23	97.3	81.7	21.1	6125213	256.9	1236.3	6.4
2019	甘肃	24761	6.8	181172	176.3	97.1	82.3	19.6	2978288	210.5	478.1	18.6
2019	青海	6114	7.8	41443	438.02	96.1	74.1	17.4	810529	235.4	107.3	25.6
2019	宁夏	4077	8	40971	214.08	88.5	81.1	17.8	1476428	242.6	163.6	20.4
2019	新疆	16851	7.4	186426	483.78	97.2	87.9	23.4	5920093	245.6	460.4	27.8
2020	北京	9675	12.61	127033	80.8	98.5	60.9	11.6	3338142	682.1	584.3	2.9
2020	天津	5258	8.22	68275	109.31	98.9	61.6	9.3	2310309	457.3	240.4	5.1
2020	河北	83972	6.96	441962	134.26	97	70.8	13.8	9034425	289.9	885	8.4
2020	山西	39224	7.69	223650	202.95	98	65.9	12.2	5211899	295.1	366.1	12.5
2020	内蒙古	23277	8.41	162072	225.65	97.8	58.8	12.2	3141250	310.5	212.8	12.7
2020	辽宁	32174	7.42	314488	155.22	97.9	62.2	13.5	4986340	369.3	410.7	14.9
2020	吉林	24424	8.81	173123	87.3	98.3	61.1	12.7	2454841	322.2	194.9	12.5
2020	黑龙江	18653	7.61	253345	105.84	98.7	48.3	11.2	3638477	332	176.2	18.4
2020	上海	5291	8.62	152191	128.63	98.4	85.2	15.1	5188734	476	639.2	3.1
2020	江苏	32703	7.85	535006	98.23	98.4	76.1	16	14714452	337.7	1652.5	7.3
2020	浙江	32376	8.49	361317	146.47	98.5	77.9	14.9	13630346	306.6	1362.1	4.1
2020	安徽	27400	6.75	407813	225.08	96.3	72.4	15.6	6567429	283.4	789.3	11.3
2020	福建	26902	6.7	216753	223.99	97.9	71.6	12.8	6468494	313.6	655.2	8.1
2020	江西	35214	6.33	285847	199.3	97.4	75.7	17.9	4862036	305	518.5	7.4
2020	山东	81126	8.01	646863	131.73	96.5	71	16.4	14729454	305.9	1344.6	8.2
2020	河南	71339	7.11	667156	152.77	94.6	78.1	18.4	10635102	236.8	1469.9	9.2
2020	湖北	33852	7.42	411351	290.81	97.2	72.1	17.8	12071041	300.8	691.7	7.1
2020	湖南	53793	7.49	519902	269.01	97.7	76.2	22.4	6733857	345.6	850.4	9.5
2020	广东	53069	6.58	564773	272.2	98.1	71.1	12.4	30692772	342.1	2171.4	7.3
2020	广西	32149	7.42	295562	263.62	99.1	82.8	19.9	7172723	243.4	523.8	11.5
2020	海南	5733	7.38	58474	339.12	97.8	66.6	11.5	1568254	324.6	99.6	9.6
2020	重庆	19838	7.42	235520	202.07	98.3	74.7	21.1	5602912	363.1	536.5	10.7
2020	四川	79491	7.56	649756	196.03	97.8	79	21	12276328	298.1	1206.4	10.9
2020	贵州	27138	7.46	276379	248.35	96.6	75.7	20.3	5498084	274.3	524.8	16.5
2020	云南	24592	7.76	325212	189.61	98.7	77.5	20.6	5911478	245.3	914.7	14.5
2020	陕西	33208	9.2	272424	150.48	98.4	68.7	17.1	6599546	288.8	778.6	9.8
2020	甘肃	24597	7.24	171866	150.52	97	71.6	17.2	2922779	211.7	322.1	12.9
2020	青海	6018	8.26	41285	376.8	95.4	70.2	17	800450	252.9	82.9	28.4
2020	宁夏	4247	8.14	41261	168.75	97.4	68.8	14.8	1384310	256.3	105.1	17.6
2020	新疆	16671	7.39	181455	324.99	98.5	69.9	16.9	6480294	260.5	309.1	18.9
2021	北京	9777	13.2	130259	94.57	98.4	73.2	16.8	4645012	679.8	915.6	4.8
2021	天津	5489	8.87	68681	138.35	98.9	68.4	11.8	2946580	452.4	357.2	7.5
2021	河北	85029	7.51	454994	134.23	97.4	68.9	13.8	13285380	293.3	1125	9.3
2021	山西	39101	8.09	228946	211.66	98.2	67	12.8	6375474	295.2	516.4	11
2021	内蒙古	23684	8.82	166598	262.64	98.1	60.1	13	3816262	307.6	295.2	14.9
2021	辽宁	30919	7.9	324528	164.27	98.3	62.7	14.5	6548973	376.3	594.7	10.9
2021	吉林	24155	9.15	176546	105.56	98.4	66.4	14.7	3681448	323.9	311.4	11.5
2021	黑龙江	18772	7.95	260536	132.22	98.7	55.5	14.1	4796221	318	237	15.4
2021	上海	5656	9.2	160378	135.23	98.3	89.3	18	8059332	436.6	1100.9	7.4
2021	江苏	33387	8.13	548560	105.94	98.7	77.2	16.6	17361702	366.3	2072.4	5.1
2021	浙江	33021	8.85	369875	144.35	98.4	79.9	16.5	18112442	311.8	2011.8	3.9
2021	安徽	27629	7.12	411023	235.01	96.8	70.7	15.5	7661734	292.9	1021.3	7.1
2021	福建	27463	7.03	223813	209.49	98.2	73.6	13.4	9000638	319.5	914.9	9.2
2021	江西	35216	6.77	307292	200.4	97.6	76.2	19.1	5027512	309.8	621	5.9
2021	山东	82062	8.39	673920	138.31	97	75.3	17.9	17127384	306	1989.7	6.8
2021	河南	75174	7.65	721329	147.92	95.2	80.1	19.4	13609866	237.4	1769.1	9.5
2021	湖北	34823	7.83	433965	199.38	97.3	78.9	20.8	14991907	291.8	1083.5	10
2021	湖南	53354	7.64	532668	302	97.7	77.6	22.8	10222452	344	977.5	9.3
2021	广东	55139	6.88	588964	272.44	98.1	74.3	13.6	46085014	351.8	3128.8	6.1
2021	广西	32643	7.82	319045	272.05	98.1	81.6	21.2	10659113	251.3	730	8.4
2021	海南	5881	7.89	61408	342.07	98.5	68.3	12.6	2035314	326	140.9	15.1
2021	重庆	20268	7.68	240741	194.67	98.4	78.2	22.7	6827283	374.1	809.1	9.5
2021	四川	76875	8.04	662029	209.56	97.9	82.2	22.3	15899945	298.6	1725.7	9.4
2021	贵州	27465	8.03	296902	245.94	97	76.5	21.9	7255554	275.3	657.9	15.9
2021	云南	24869	8.12	330278	191.41	98.7	78.5	21.2	7540463	246.2	1217.6	12.4
2021	陕西	33185	9.32	284545	155.42	98.6	72.4	18.4	8645473	288.6	1132.3	7.7
2021	甘肃	24373	8.07	183166	155.81	97.5	69.6	17.9	3887959	227.1	399.6	15.1
2021	青海	6011	8.7	42153	392.09	97.2	66.6	16.5	1201029	254.5	93.4	24.9
2021	宁夏	4242	8.36	41191	174.59	99.2	67.4	14.9	1564327	255.8	130.1	11.2
2021	新疆	15528	7.74	186127	331.86	99.1	73.6	18	6465678	257.9	406	17
